# Supplementary material
Source: PubMed Central journal article supplement (PMC7311053)
Supplement: jp0c01458_si_001.pdf [file jp0c01458_si_001.pdf]

## Supporting Information for

### *Seeing is Believing: Experimental Spin States from Machine Learning Model Structure Predictions*

Michael G. Taylor<sup>1,#</sup>, Tzuhsiung Yang<sup>1,#</sup>, Sean Lin<sup>1,#</sup>, Aditya Nandy<sup>1,2</sup>, Jon Paul Janet<sup>1</sup>, Chenru Duan<sup>1,2</sup>, and Heather J. Kulik<sup>1,\*</sup>

<sup>1</sup>Department of Chemical Engineering, Massachusetts Institute of Technology, Cambridge, MA 02139

<sup>2</sup>Department of Chemistry, Massachusetts Institute of Technology, Cambridge, MA 02139

<sup>#</sup>These authors contributed equally.

#### Contents

|                                                                                          |          |
|------------------------------------------------------------------------------------------|----------|
| <b>Table S1</b> CSD structural properties for Fe(II)/Fe(III) spectrochemical homoleptics | Page S2  |
| <b>Figure S1</b> Fe(III) homoleptic complex spin splitting and structure vs. CSD         | Page S2  |
| <b>Table S2</b> Hyperparameters and architecture of bond length ANN                      | Page S3  |
| <b>Text S1</b> Detailed description of equatorial plane assignment                       | Page S4  |
| <b>Figure S2</b> Degree of distortion in the eq. plane for all unique complexes          | Page S5  |
| <b>Figure S3</b> Degree of distortion in the eq. plane for all ANN-compatible complexes  | Page S5  |
| <b>Figure S4</b> Histogram of molecular weights for all unique complexes                 | Page S6  |
| <b>Figure S5</b> Histogram of molecular weights for all ANN-compatible complexes         | Page S6  |
| <b>Table S3</b> Overall number of element types and frequency in unique complexes        | Page S7  |
| <b>Table S4</b> Equatorial plane ligand type combinations in unique complexes            | Page S8  |
| <b>Table S5</b> Axial plane ligand type combinations in unique complexes                 | Page S9  |
| <b>Table S6</b> Overall eq./ax. plane element type combinations in unique complexes      | Page S10 |
| <b>Figure S6</b> Histograms of Fe(II)-L distances for identical coordinating atom cases  | Page S11 |
| <b>Figure S7</b> Histograms of Fe(III)-L distances for identical coordinating atom cases | Page S11 |
| <b>Table S7</b> Covalent radii used for relative distance assignments                    | Page S12 |
| <b>Figure S8</b> Histogram of Fe-X bond lengths for all unique Fe(II) complexes          | Page S13 |
| <b>Figure S9</b> Histogram of Fe-X bond lengths for all unique Fe(III) complexes         | Page S14 |
| <b>Figure S10</b> Histogram of Fe-X bond lengths for ANN-compatible Fe(II) complexes     | Page S15 |
| <b>Figure S11</b> Histogram of Fe-X bond lengths for ANN-compatible Fe(III) complexes    | Page S16 |
| <b>Figure S12</b> Histograms of Fe(III)-L rel. dist. for HE cases with small data Fe(II) | Page S17 |
| <b>Table S8</b> Eq./ax. plane element type combinations for ANN-compatible complexes     | Page S18 |
| <b>Table S9</b> Pairs of element types for subset of ANN-compatible complexes            | Page S19 |
| <b>Figure S13</b> 2D histogram of Fe-N/Fe-X relative distances in Fe(III) complexes      | Page S20 |
| <b>Figure S14</b> Degree of distortion overall for all unique complexes                  | Page S21 |
| <b>Figure S15</b> Degree of distortion overall for all ANN-compatible complexes          | Page S21 |
| <b>Figure S16</b> Degree of distortion in the ax. plane for all unique complexes         | Page S22 |
| <b>Figure S17</b> Degree of distortion in the ax. plane for all ANN-compatible complexes | Page S22 |
| <b>Table S10</b> Spin state classification results on the AC set                         | Page S23 |
| <b>Table S11</b> Spin state classification of HE subset by coordinating element          | Page S23 |
| <b>Table S12</b> Number of confident spin state assignments in NX set (X=Cl, O, S)       | Page S24 |
| <b>Table S13</b> SCO complex predictions and properties                                  | Page S25 |
| <b>References</b>                                                                        | Page S26 |

**Table S1.** Characteristics of spectrochemical series homoleptic complexes that were obtained from the CSD UO set for Fe(II) and Fe(III) complexes: the bond length (in Å) of the CSD complex, the name of the complex assigned during deposit, the nominal ligand, the molecular weight used to search for the complex, and the CSD ID of the complex are all shown. In several cases, no available experimental complex could be found, as indicated by --.

|                  | Fe(II)  |                                    |        |       | Fe(III)                                  |        |       |
|------------------|---------|------------------------------------|--------|-------|------------------------------------------|--------|-------|
|                  | MW      | Name                               | CSD ID | Value | Name                                     | CSD ID | Value |
| H <sub>2</sub> O | 163.935 | hexakis(aqua)-iron(ii)             | AMAVOB | 2.12  | hexaaqua-iron(iii)                       | MEWZAP | 2.00  |
| acac             | 356.196 | --                                 | --     | --    | --                                       | --     | --    |
| NCS-             | 404.313 | --                                 | --     | --    | --                                       | --     | --    |
| NH <sub>3</sub>  | 158.031 | hexaammine-iron(ii)                | CACDIW | 2.23  | --                                       | --     | --    |
| phen             | 596.475 | tris(1,10-Phenanthroline)-iron(ii) | AFIRAJ | 1.98  | tris(1,10-Phenanthroline-N,N')-iron(iii) | BIPGEN | 1.98  |
| CN-              | 211.953 | hexacyano-iron(ii)                 | BAMBAV | 1.91  | hexacyano-iron(iii)                      | XESMEQ | 1.93  |
| CO               | 223.905 | --                                 | --     | --    | --                                       | --     | --    |

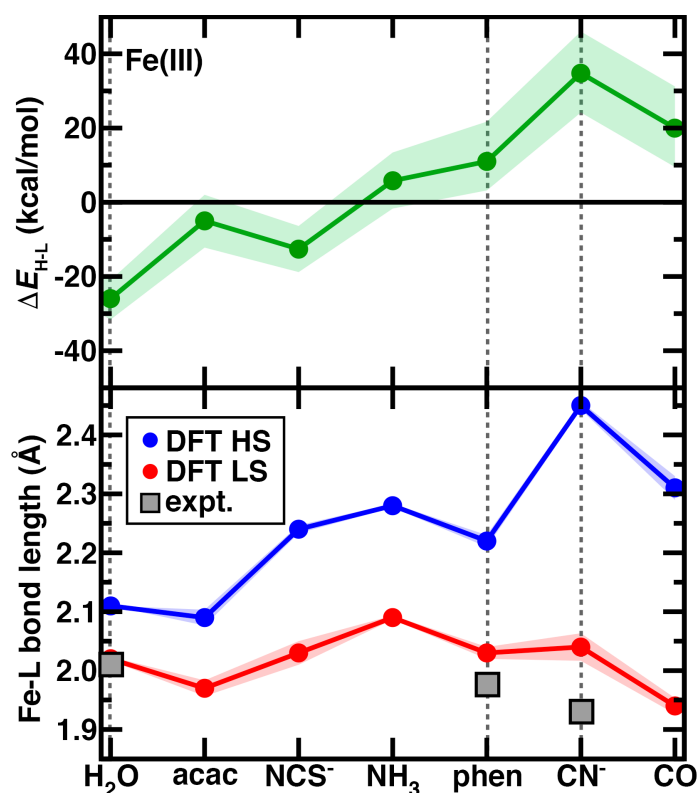

**Figure S1.** Properties of homoleptic, octahedral mononuclear Fe(III) transition metal complexes with ligands ordered by their field strength in the spectrochemical series. Properties shown are evaluated with hybrid DFT (B3LYP,  $a_{\text{HF}} = 0.2$ , solid lines and circle symbols) along with the range of properties evaluated at  $a_{\text{HF}} = 0.1-0.3$  shown as a translucent shaded region. The high-spin to low-spin adiabatic spin splitting energy ( $\Delta E_{\text{H-L}}$ , in kcal/mol) is shown at top, and the Fe-L bond lengths (in Å) for the high spin (HS) and low spin (LS) states are shown at bottom. Representative Fe-L bond lengths from crystal structures are shown as gray squares as indicated in inset legend, and vertical dotted lines are shown to enable comparison of bond-length-derived spin-state assignment (bottom) and energetic assignment (top).

**Table S2.** Hyperparameters and details of the RAC-155/ANN bond length model. The RAC-155 ANN hyperparameters were selected with Hyperopt. The hidden ANN topology is the number of nodes in each layer (i.e., 3 hidden layers for the RAC-155 ANN).

| <b>Hyperparameter</b>            | <b>RAC-155 Bond length ANN</b>                                                           |
|----------------------------------|------------------------------------------------------------------------------------------|
| Hidden ANN topology              | 300x300x200                                                                              |
| Activation function              | tanh                                                                                     |
| Output layer activation function | linear                                                                                   |
| Learning rate                    | 0.002                                                                                    |
| Optimizer                        | adam                                                                                     |
| Batch size                       | 64                                                                                       |
| Epochs                           | 1200                                                                                     |
| L2 regularization                | 1e-15                                                                                    |
| Dropout % (all hidden nodes)     | 5                                                                                        |
| Training data                    | Spin splitting data as per Ref. <sup>1</sup> and Redox data set as per Ref. <sup>2</sup> |
| Hyperparameter optimization      | Hyperopt                                                                                 |
| Data partitioning                | 80% train (10% used in Hyperopt for validation) / 20% test                               |

**Text S1.** Details of equatorial plane assignment.

The following general rules were used to resolve the equatorial planes in a consistent, repeatable, and physically informed manner accounting for as many as possible combinations of different ligand identity and denticity. First, if the highest denticity ligand in a structure lay entirely in a defined plane (e.g. tetradentate ligand with two *trans*-monodentate ligands), the highest denticity ligand plane was assigned as the equatorial plane. If the highest denticity ligand did not lie entirely in a single plane (e.g. tetradentate ligand with two *cis*-monodentate ligands), but an equatorial plane could be unambiguously assigned by any set of the lower denticity ligands, the equatorial plane was assigned by this unambiguous plane (e.g. the two *cis*-monodentate ligands and the tetradentate metal-connecting opposite them). For cases where the lowest denticity ligands did not unambiguously form a plane (e.g. three *fac*-monodentate ligands with a tridentate ligand), the plane with the highest molecular weight was assigned the equatorial plane or, for pentadentate ligands, the four contacts of the pentadentate ligand that form a plane were assigned as the equatorial plane. For hexadentate ligands, the plane that contains the metal-connecting atoms with the highest total molecular weight was assigned as the equatorial plane. For complexes with only monodentate ligands, identical ligands were treated like a single ligand of the denticity equal to the number of each type of identical ligand and were treated following identical rules as above. For cases where monodentate ligands formed binding conformations not physical with higher denticities (e.g. three pairs of *trans*-monodentates, where triple bidentate cases can only form equivalent “*cis*” conformations) the plane with the highest molecular weight was assigned as the equatorial plane. If, following all of these rules, an identified equatorial plane did not contain metal-connecting atoms of the same elements, the equatorial plane was re-assigned to a plane containing only metal-connecting atoms of the same element.

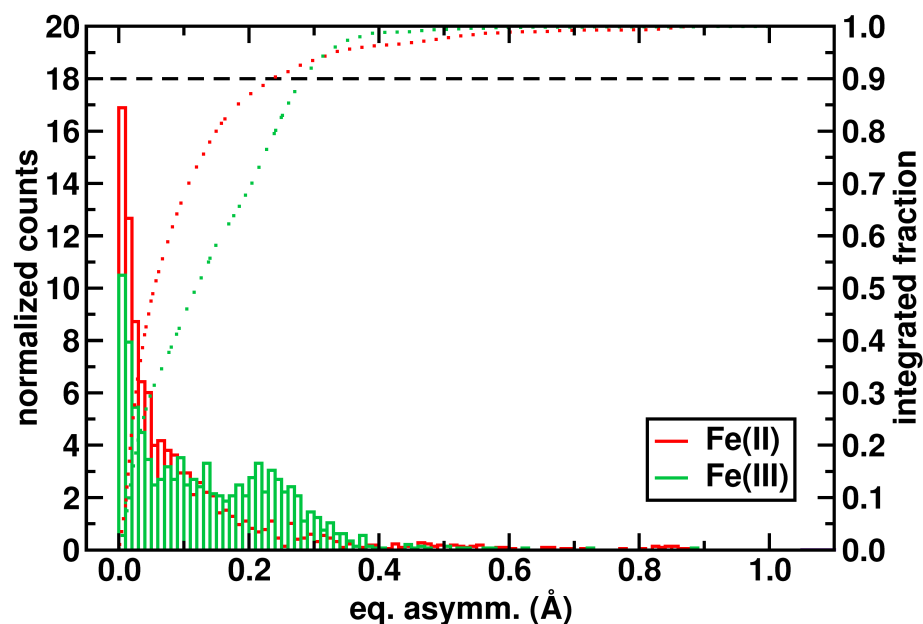

**Figure S2.** Degree of distortion (i.e., max-min distances) for an equatorial plane selected to minimize the overall equatorial distortion for all 3,627 unique Fe(II) (shown in red) or Fe(III) (shown in green) complexes. A normalized histogram with 0.01 Å bins is shown with axis at left as well as an integrated fraction shown as a dotted line with the same coloring, axis shown at right. A black dashed horizontal line indicates where the fraction reaches 0.9.

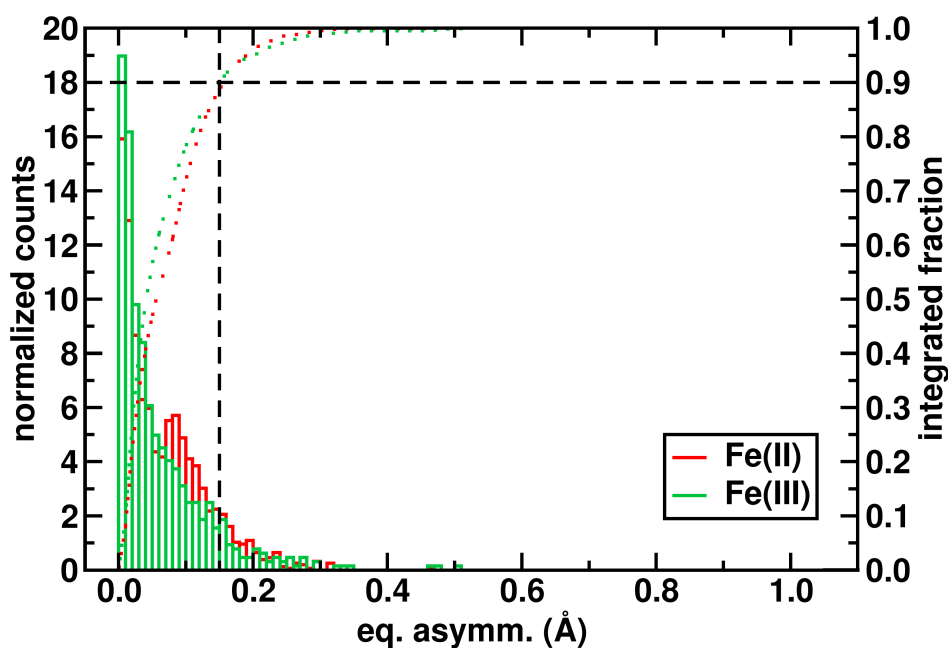

**Figure S3.** Degree of distortion (i.e., max-min distances) in the equatorial plane for 2,201 complexes with equatorial symmetry (i.e., same elements in the equatorial plane), unique Fe(II) (shown in red) or Fe(III) (shown in green) complexes. A normalized histogram with 0.01 Å bins is shown with axis at left as well as an integrated fraction shown as a dotted line with the same coloring, axis shown at right. A black dashed horizontal line indicates where the fraction reaches 0.9.

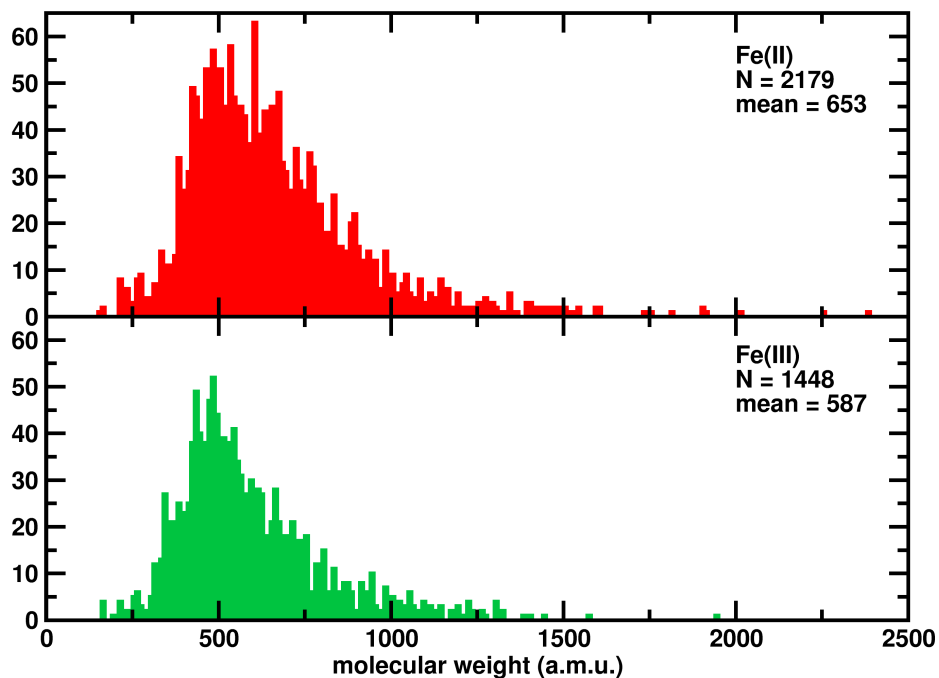

**Figure S4.** Molecular weight distribution of all 3,627 unique mononuclear Fe octahedral complexes with Fe(II) shown at top and Fe(III) shown at bottom. The number of data points as well as the mean molecular weight of the data set is shown in inset.

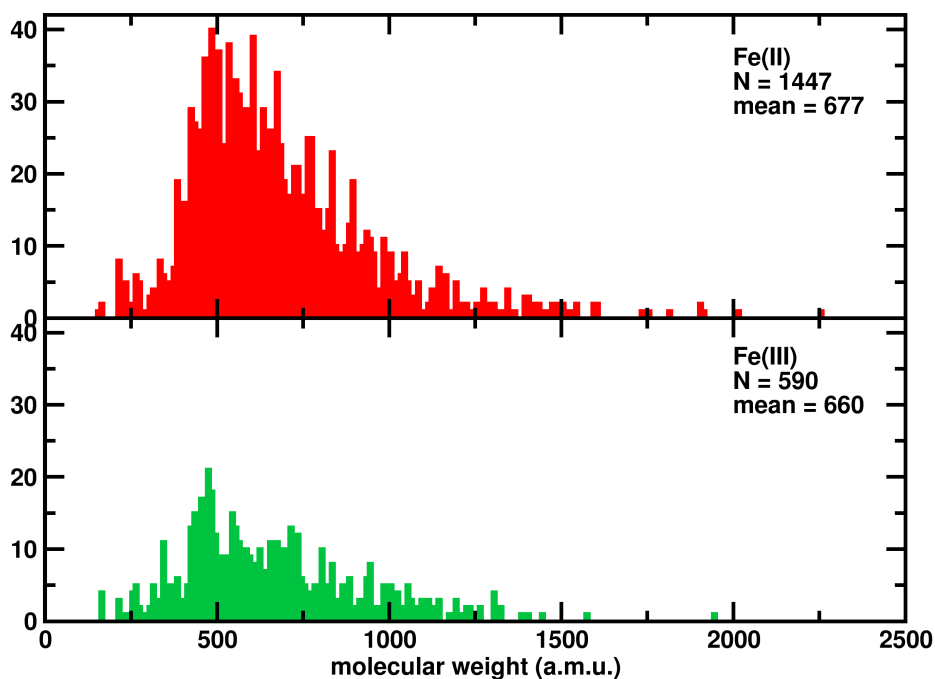

**Figure S5.** Molecular weight distribution of all 2,037 unique mononuclear Fe octahedral complexes that are ANN compatible with distortion outliers removed. Fe(II) is shown at top and Fe(III) shown at bottom. The number of data points as well as the mean molecular weight of the data set is shown in inset.

**Table S3.** Overall number of element types and frequency of each occurrence observed in 3,627 unique mononuclear iron octahedral complexes (2,179 Fe(II) and 1,448 Fe(III)). Variations are listed in increasing number of distinct element types, from 1 to a maximum of 5 (for Fe(II) only).

| Fe(II)                |     | Fe(III)     |     | Fe(II)                         |    | Fe(III)   |    | Fe(II)                           |   | Fe(III)                |   | Fe(II)                 |  | Fe(III) |  |
|-----------------------|-----|-------------|-----|--------------------------------|----|-----------|----|----------------------------------|---|------------------------|---|------------------------|--|---------|--|
| One ligand elem type  |     |             |     | Two ligand elem types (cont'd) |    |           |    | Three ligand elem types (cont'd) |   |                        |   | Four ligand elem types |  |         |  |
| NNNNNN                | 964 | NNNNNN      | 184 | IIPPPP                         | 2  | NNNNOS    | 2  | CCICINPP                         | 6 | CINNOOS                | 4 |                        |  |         |  |
| OOOOOO                | 48  | OOOOOO      | 135 | HHHPPP                         | 2  | CCCIPP    | 2  | CHNPPP                           | 4 | CICINOOS               | 3 |                        |  |         |  |
| CCCCCC                | 17  | SSSSSS      | 29  | HPPPPP                         | 2  | CINNPPP   | 2  | BrCCNNS                          | 3 | CICINNOS               | 2 |                        |  |         |  |
| SSSSSS                | 7   | CCCCCC      | 6   | OOOOPP                         | 2  | CCCICPP   | 1  | CCINPPP                          | 2 | BrNNOOS                | 1 |                        |  |         |  |
| PPPPPP                | 2   | FFFFFF      | 1   | FOOOOO                         | 1  | BrCCCN    | 1  | CHHNPP                           | 2 |                        |   |                        |  |         |  |
| CICICICICI            | 1   | CICICICICI  | 1   | CICICICIO                      | 1  | CCNNNP    | 1  | CCINPPP                          | 2 |                        |   |                        |  |         |  |
| AsAsAsAsAsAs          | 1   |             |     | CCCCCS                         | 1  | CCCIS     | 1  | CNNPSS                           | 2 |                        |   |                        |  |         |  |
| Two ligand elem types |     |             |     | BrBrBrCCC                      | 1  | CCCNSS    | 1  | CINPPP                           | 2 |                        |   |                        |  |         |  |
| NNNNOO                | 304 | NNNNOO      | 284 | CICICICINN                     | 1  | CCNNOO    | 1  | CCINNP                           | 2 |                        |   |                        |  |         |  |
| NNOOOO                | 95  | NNOOOO      | 115 | CICISSSS                       | 1  | NOSSSS    | 1  | CCNOPP                           | 1 |                        |   |                        |  |         |  |
| CICINNNN              | 75  | NNNOOO      | 105 | CCSiSiSiSi                     | 1  | AsCCCHH   | 1  | CINNNO                           | 1 |                        |   |                        |  |         |  |
| NNNNNO                | 41  | NNNNSS      | 68  | CSSSSS                         | 1  | CCPPSeSe  | 1  | CHNNPP                           | 1 |                        |   |                        |  |         |  |
| CINNNNN               | 31  | CICICINNN   | 60  | CCIII                          | 1  | CCCNNO    | 1  | HNNPPSi                          | 1 |                        |   |                        |  |         |  |
| NNNNPP                | 31  | CICINNNN    | 58  | CCCCICI                        | 1  | NNNOSS    | 1  | BrCCNPP                          | 1 |                        |   |                        |  |         |  |
| CCNNNN                | 27  | NNNNNO      | 38  | CCCCCP                         | 1  | CCPSSS    | 1  | BrNNPSS                          | 1 |                        |   |                        |  |         |  |
| NNPPPP                | 26  | CCNNNN      | 21  | BrBrOOOO                       | 1  | CNSSSS    | 1  | BrNNOSS                          | 1 |                        |   |                        |  |         |  |
| NNNOOO                | 24  | CCCNNN      | 20  | CCCCCI                         | 1  | CNNNNS    | 1  | BrCCOPP                          | 1 |                        |   |                        |  |         |  |
| CNNNNN                | 23  | NOOOOO      | 18  | AsAsNNNN                       | 1  | BrBrNNNO  | 1  | BrBrCCNP                         | 1 |                        |   |                        |  |         |  |
| NNNNSS                | 22  | CIOOOOO     | 9   | AsAsAsAsII                     | 1  | CCCINN    | 1  | CINNOOS                          | 1 |                        |   |                        |  |         |  |
| CCPPPP                | 17  | CICIOOOO    | 8   | NNNNNP                         | 1  | CINPPPP   | 1  | CCCIPS                           | 1 |                        |   |                        |  |         |  |
| CICIPPPP              | 17  | CCCCNN      | 8   | CCCCOO                         | 1  | CISSSS    | 1  | CCCHPSi                          | 1 |                        |   |                        |  |         |  |
| NNNPPP                | 12  | CNNNNN      | 8   | Three ligand elem types        |    |           |    | CFPPPP                           | 1 | CCCIPS                 | 1 |                        |  |         |  |
| NNSSSS                | 11  | CCCCCN      | 7   | HNPPPP                         | 14 | CINNNOO   | 32 | BrBrCCCTe                        | 1 | CCOPPSn                | 1 |                        |  |         |  |
| BrBrNNNN              | 11  | CINNNNN     | 6   | CICINNOO                       | 11 | CICINNOO  | 29 | HOPPPP                           | 1 | Five ligand elem types |   |                        |  |         |  |
| CCCCNN                | 9   | BrBrNNNN    | 6   | CICINNOO                       | 8  | CICICINNO | 21 | AsAsCCCP                         | 1 | CHNOPP                 | 1 |                        |  |         |  |
| OOPPPP                | 8   | CICICICINN  | 5   | CHPPPP                         | 8  | NNOOSS    | 19 | CIPPPP                           | 1 | CHNPPSi                | 1 |                        |  |         |  |
| NOOOOO                | 7   | NNNSSS      | 5   | CINNNNO                        | 8  | CICINNOO  | 18 | HPPPPSe                          | 1 | CCINOP                 | 1 |                        |  |         |  |
| BrNNNNN               | 7   | CICIPPPP    | 5   | CCNNSS                         | 7  | CINNOOO   | 18 | FNNNNS                           | 1 |                        |   |                        |  |         |  |
| CCSSSS                | 7   | OOSSSS      | 5   | NNOOSS                         | 6  | CINNNNO   | 9  | CCPPPS                           | 1 |                        |   |                        |  |         |  |
| CCCCCN                | 6   | NNNNPP      | 4   | CINNNOO                        | 6  | NNNOOS    | 8  | CCNNPP                           | 1 |                        |   |                        |  |         |  |
| CCCCSS                | 6   | NNSSSS      | 3   | CCNPP                          | 5  | CICINOOO  | 5  | CCSeSeTe                         | 1 |                        |   |                        |  |         |  |
| CCCCII                | 6   | BrBrBrNNN   | 3   | CCIPPPP                        | 5  | CNNNOO    | 5  | CCSeTeTe                         | 1 |                        |   |                        |  |         |  |
| BrBrPPPP              | 6   | FFNNNN      | 2   | CNNNNO                         | 4  | CNNNNO    | 4  | CCCISe                           | 1 |                        |   |                        |  |         |  |
| CCCNNN                | 5   | PPSSSS      | 2   | CCPPSS                         | 4  | CINOOOO   | 3  | CICINNP                          | 1 |                        |   |                        |  |         |  |
| CCSSSS                | 4   | FFFFOO      | 1   | CCNPPP                         | 4  | CICICINNS | 3  | HNNPPP                           | 1 |                        |   |                        |  |         |  |
| OOSSSS                | 4   | FFFFFO      | 1   | HPPPPS                         | 4  | BrNNNOO   | 3  | CPPSSS                           | 1 |                        |   |                        |  |         |  |
| CIPPPPP               | 4   | CICICIOOO   | 1   | NNPPSS                         | 4  | CCNNOO    | 2  | CINNNPP                          | 1 |                        |   |                        |  |         |  |
| NNNNNS                | 3   | CICICICIO   | 1   | CIHPPPP                        | 4  | NNNNOS    | 2  | CCHHPP                           | 1 |                        |   |                        |  |         |  |
| CCCCPP                | 3   | CICICICICIO | 1   | CNPPPP                         | 4  | CICICINOO | 1  | BrCPPPP                          | 1 |                        |   |                        |  |         |  |
| PPSSSS                | 3   | FFFNNN      | 1   | CCCISe                         | 4  | FNNNNO    | 1  | CCCHNN                           | 1 |                        |   |                        |  |         |  |
| NNNNSeSe              | 3   | BrOOOOO     | 1   | CICINNSS                       | 3  | CICINNNNS | 1  | BrBrCCCN                         | 1 |                        |   |                        |  |         |  |
| CCCCSnSn              | 3   | NNNNNS      | 1   | NPSSSS                         | 3  | CICIOOSS  | 1  | CCCCHN                           | 1 |                        |   |                        |  |         |  |
| BrCCCC                | 2   | CICICISSS   | 1   | CNNNPP                         | 3  | CNPPPP    | 1  | CCIIPP                           | 1 |                        |   |                        |  |         |  |
| OOOOSS                | 2   | OOOSeSeSe   | 1   | COPPPP                         | 3  | CCNNSS    | 1  | CCICIPP                          | 1 |                        |   |                        |  |         |  |
| CICICINNN             | 2   | FNNNNN      | 1   | CNNSSS                         | 2  | BrBrNNNO  | 1  | NNOOPP                           | 1 |                        |   |                        |  |         |  |
| CICIOOOO              | 2   | NNNNNP      | 1   | HHHNPP                         | 2  | CNNNSS    | 1  | CCNNSiSi                         | 1 |                        |   |                        |  |         |  |
| NNNNSS                | 2   | NNNNSeSe    | 1   | CCCNNS                         | 2  | BrNNOOO   | 1  | CCCIPP                           | 1 |                        |   |                        |  |         |  |
| CCCSiSi               | 2   | OOOOSS      | 1   | CINNNNS                        | 2  | NNNOSS    | 1  | NOOPPP                           | 1 |                        |   |                        |  |         |  |
| CCPPPP                | 2   | AsAsAsAsII  | 1   | CNNNSS                         | 2  | NNOOPP    | 1  | CCCCIPP                          | 1 |                        |   |                        |  |         |  |
| INNNNN                | 2   | OOOOSeSe    | 1   | CPSSSS                         | 2  |           |    | CCPPPSn                          | 1 |                        |   |                        |  |         |  |
| IISSSS                | 2   | BrBrOOOO    | 1   | HNNNPP                         | 2  |           |    |                                  |   |                        |   |                        |  |         |  |
| PPPPSS                | 2   |             |     | CCOOPP                         | 2  |           |    |                                  |   |                        |   |                        |  |         |  |

**Table S4.** Combinations of equatorial ligand element types and frequency of each occurrence observed after assignment of equatorial plane in 3,627 unique mononuclear iron octahedral complexes (2,179 Fe(II) and 1,448 Fe(III)). The types of equatorial ligand elements are grouped by the total unique number of elements and listed in increasing order, where applicable. Only the one-element type subset is ANN-compatible.

| Fe(II)                          |      | Fe(III)                           |     | Fe(III)                           |   | Fe(III)                           |    |
|---------------------------------|------|-----------------------------------|-----|-----------------------------------|---|-----------------------------------|----|
| One ligand element type         |      | Two ligand element types (cont'd) |     | Two ligand element types (cont'd) |   | Two ligand element types (cont'd) |    |
| N                               | 1264 | N                                 | 372 | IPPP                              | 1 |                                   |    |
| O                               | 127  | O                                 | 214 | CCCH                              | 1 |                                   |    |
| P                               | 95   | S                                 | 32  | OOSS                              | 1 |                                   |    |
| C                               | 38   | C                                 | 13  | IIPP                              | 1 |                                   |    |
| S                               | 29   | P                                 | 5   | BrBrNN                            | 1 |                                   |    |
| Cl                              | 3    | F                                 | 3   | CCSiSi                            | 1 |                                   |    |
| As                              | 2    | Cl                                | 3   | CSiSiSi                           | 1 |                                   |    |
|                                 |      | As                                | 1   | PPPSe                             | 1 |                                   |    |
| <b>Two ligand element types</b> |      |                                   |     | CCCSn                             | 1 |                                   |    |
| <b>Two ligand element types</b> |      |                                   |     | <b>Three ligand element types</b> |   |                                   |    |
| NNOO                            | 124  | NNNO                              | 197 | CNPP                              | 5 | CICINO                            | 19 |
| NNNO                            | 124  | NNOO                              | 176 | CINNO                             | 5 | NNOS                              | 17 |
| NNPP                            | 46   | CICINN                            | 108 | CINNO                             | 5 | NNOS                              | 17 |
| CINNN                           | 44   | NOOO                              | 71  | CPPS                              | 4 | CINNO                             | 15 |
| CICINN                          | 25   | NNSS                              | 62  | CNNS                              | 4 | CNNO                              | 6  |
| CCNN                            | 21   | CINNN                             | 51  | CINPP                             | 4 | CINOO                             | 3  |
| GPPP                            | 18   | CCNN                              | 17  | CCiTe                             | 4 | BrNNO                             | 2  |
| NOOO                            | 14   | CCCN                              | 11  | NPSS                              | 2 | CCNS                              | 1  |
| NNSS                            | 14   | NNNS                              | 7   | CICINO                            | 2 |                                   |    |
| NPPP                            | 13   | CICICIN                           | 7   | NPPSi                             | 2 |                                   |    |
| CCCN                            | 10   | OOSS                              | 6   | CCSeTe                            | 2 |                                   |    |
| OOPP                            | 9    | CICIOO                            | 6   | CCNS                              | 1 |                                   |    |
| CNNN                            | 8    | CNNN                              | 3   | CNNO                              | 1 |                                   |    |
| NNNS                            | 8    | CIOOO                             | 2   | CPSS                              | 1 |                                   |    |
| CCPP                            | 8    | BrBrBrN                           | 2   | CCOP                              | 1 |                                   |    |
| CCCS                            | 7    | FFNN                              | 1   | CCNO                              | 1 |                                   |    |
| CSSS                            | 6    | NSSS                              | 1   | CCPS                              | 1 |                                   |    |
| CiPPP                           | 6    | CCOO                              | 1   | NNOS                              | 1 |                                   |    |
| CCSS                            | 5    | OSSS                              | 1   | CNNP                              | 1 |                                   |    |
| CCCI                            | 5    | CPPP                              | 1   | CICINS                            | 1 |                                   |    |
| CiCIPP                          | 5    | PPSS                              | 1   | CPPSe                             | 1 |                                   |    |
| PSSS                            | 3    | PSSS                              | 1   | BrNNO                             | 1 |                                   |    |
| CCCP                            | 3    | OOS                               | 1   | BrCCN                             | 1 |                                   |    |
| CiCIPP                          | 3    | OOPP                              | 1   | AsCCP                             | 1 |                                   |    |
| BrNNN                           | 3    | CICICIO                           | 1   | CCiSe                             | 1 |                                   |    |
| NNSeSe                          | 3    | CICISS                            | 1   | <b>Four ligand element types</b>  |   |                                   |    |
| NSSS                            | 2    | BrNNN                             | 1   | CNOP                              | 1 |                                   |    |
| HHHN                            | 2    | OOSeSe                            | 1   | BrNOS                             | 1 |                                   |    |
| CCHH                            | 2    | BrBrNN                            | 1   |                                   |   |                                   |    |
| PPPS                            | 2    | NNSeSe                            | 1   |                                   |   |                                   |    |
| PPSS                            | 2    | OOSeSe                            | 1   |                                   |   |                                   |    |
| CCOO                            | 2    |                                   |     |                                   |   |                                   |    |
| HHPP                            | 2    |                                   |     |                                   |   |                                   |    |
| CCCO                            | 2    |                                   |     |                                   |   |                                   |    |
| BrBrCC                          | 2    |                                   |     |                                   |   |                                   |    |
| CiCISS                          | 2    |                                   |     |                                   |   |                                   |    |
| BrPPP                           | 2    |                                   |     |                                   |   |                                   |    |
| OPPP                            | 1    |                                   |     |                                   |   |                                   |    |
| CCII                            | 1    |                                   |     |                                   |   |                                   |    |
| ISSS                            | 1    |                                   |     |                                   |   |                                   |    |
| FNNN                            | 1    |                                   |     |                                   |   |                                   |    |
| IISS                            | 1    |                                   |     |                                   |   |                                   |    |



**Table S5.** Combinations of axial ligands and frequency of each occurrence observed after assignment of equatorial plane in 3,627 unique mononuclear iron octahedral complexes (2,179 Fe(II) and 1,448 Fe(III)). Symmetric axial ligand connecting atoms are listed first followed by two-ligand combinations.

| <b>Fe(II)</b>                   |      | <b>Fe(III)</b> |     |
|---------------------------------|------|----------------|-----|
| <b>One ligand element type</b>  |      |                |     |
| N                               | 1192 | N              | 380 |
| O                               | 197  | O              | 251 |
| C                               | 51   | Cl             | 53  |
| Cl                              | 47   | S              | 37  |
| P                               | 39   | C              | 24  |
| S                               | 37   | Br             | 6   |
| Cl                              | 17   | P              | 4   |
| Br                              | 13   | F              | 3   |
| I                               | 4    | I              | 1   |
| Si                              | 2    |                |     |
| H                               | 2    |                |     |
| As                              | 2    |                |     |
| Sn                              | 2    |                |     |
| F                               | 1    |                |     |
| <b>Two ligand element types</b> |      |                |     |
| NO                              | 197  | NO             | 414 |
| CIN                             | 82   | CIN            | 91  |
| CN                              | 70   | CIO            | 60  |
| CS                              | 34   | CN             | 44  |
| NP                              | 21   | OS             | 39  |
| HN                              | 20   | NS             | 14  |
| NS                              | 19   | BrN            | 7   |
| CP                              | 17   | CO             | 5   |
| BrN                             | 12   | CIS            | 5   |
| HP                              | 12   | FO             | 2   |
| CCI                             | 11   | FN             | 2   |
| CIO                             | 10   | NP             | 2   |
| CO                              | 9    | OSe            | 2   |
| BrC                             | 8    | PS             | 1   |
| CH                              | 8    | BrO            | 1   |
| CIP                             | 6    |                |     |
| BrP                             | 5    |                |     |
| OS                              | 4    |                |     |
| CIH                             | 4    |                |     |
| HS                              | 3    |                |     |
| IP                              | 3    |                |     |
| AsC                             | 2    |                |     |
| CSe                             | 2    |                |     |
| HO                              | 2    |                |     |
| IN                              | 2    |                |     |
| PS                              | 2    |                |     |
| PSn                             | 2    |                |     |
| CTe                             | 2    |                |     |
| CSi                             | 1    |                |     |
| CF                              | 1    |                |     |
| PSi                             | 1    |                |     |
| CSn                             | 1    |                |     |

**Table S6.** Overall combination of equatorial and axial ligand element types and frequency of each occurrence observed after assignment of equatorial plane in 3,627 unique mononuclear iron octahedral complexes (2,179 Fe(II) and 1,448 Fe(III)) with the 2,201 that are ANN-compatible indicated.

| Fe(II)         |     |      |      |        |        |                  |      |        |     |         |        | Fe(III)    |      |       |    |    |    |                  |         |         |     |      |        |     |    |
|----------------|-----|------|------|--------|--------|------------------|------|--------|-----|---------|--------|------------|------|-------|----|----|----|------------------|---------|---------|-----|------|--------|-----|----|
| ANN compatible |     |      |      |        |        | ANN incompatible |      |        |     |         |        | ANN compat |      |       |    |    |    | ANN Incompatible |         |         |     |      |        |     |    |
| AsI            | 1   | PCIH | 4    | AsCCP  | AsC    | 1                | CCSS | CS     | 4   | CPSS    | CS     | 1          | NPSS | CN    | 2  | As | I  | 1                | BrBrBrN | N       | 2   | NNNO | CIO    | 8   |    |
| AsAs           | 1   | PCIP | 4    | BrBrCC | BrC    | 1                | CCSS | S      | 1   | CSiSiSi | CSi    | 1          | NSSS | CN    | 2  | C  | CN | 7                | BrBrNN  | BrN     | 1   | NNNO | O      | 8   |    |
| C              | C   | 17   | PBr  | 4      | BrBrCC | CTe              | 1    | CiCINN | N   | 22      | CCSS   | CS         | 6    | OOPP  | P  | 7  | C  | C                | 6       | BrNNN   | BrN | 1    | NNNO   | OS  | 7  |
| C              | CN  | 6    | PHS  | 3      | BrBrNN | N                | 1    | CiCINN | CIN | 1       | FNNN   | NS         | 1    | OOPP  | N  | 1  | Cl | O                | 1       | BrNNO   | BrN | 1    | NNNO   | NS  | 1  |
| C              | BrC | 2    | PCCI | 2      | BrCCN  | BrP              | 1    | CiCINN | O   | 1       | HHHN   | P          | 2    | OOPP  | NP | 1  | Cl | CIO              | 1       | BrNNO   | OS  | 1    | NNNO   | CIN | 1  |
| C              | N   | 2    | PCO  | 2      | BrNNN  | BrN              | 3    | CiCINN | P   | 1       | HHPP   | HP         | 2    | OOSS  | N  | 1  | Cl | Cl               | 1       | CCCN    | CN  | 8    | NNNS   | NS  | 6  |
| C              | P   | 2    | PCN  | 2      | BrNNO  | BrN              | 1    | CiCINO | NO  | 1       | IIPP   | C          | 1    | OPPP  | CP | 1  | F  | O                | 1       | CCCN    | N   | 3    | NNNS   | S   | 1  |
| C              | Sn  | 2    | PP   | 2      | BrNOS  | NS               | 1    | CiCINO | N   | 1       | IISS   | S          | 1    | PPPS  | HP | 1  | F  | FO               | 1       | CCNN    | CN  | 17   | NNOO   | NO  | 87 |
| C              | CS  | 1    | PHP  | 2      | BrPPP  | BrP              | 2    | CiCINS | NS  | 1       | IPPP   | IP         | 1    | PPPS  | PS | 1  | F  | F                | 1       | CCNS    | NS  | 1    | NNOO   | N   | 39 |
| C              | Si  | 1    | PO   | 1      | CCCH   | PSi              | 1    | CiCIPP | CN  | 5       | ISSS   | CS         | 1    | PPPSe | HP | 1  | N  | N                | 184     | CCOO    | N   | 1    | NNOO   | CIN | 19 |
| C              | Cl  | 1    | PCIN | 1      | CCCI   | Cl               | 5    | CiCISS | N   | 2       | NNNO   | NO         | 116  | PPSS  | S  | 1  | N  | O                | 73      | CiCICIN | N   | 5    | NNOO   | O   | 15 |
| C              | CP  | 1    | PCF  | 1      | CCCN   | CN               | 7    | CiCIPP | CCI | 1       | NNNO   | CIN        | 4    | PPSS  | CS | 1  | N  | NO               | 38      | CiCICIN | NO  | 2    | NNOO   | CIO | 11 |
| C              | CCI | 1    | PHO  | 1      | CCCN   | P                | 1    | CiCIPP | CN  | 1       | NNNO   | S          | 1    | PSSS  | CS | 2  | N  | C                | 18      | CiCICIO | O   | 1    | NNOO   | BrN | 3  |
| C              | HN  | 1    | PCI  | 1      | CCCN   | HN               | 1    | CiCIPP | CS  | 1       | NNNO   | Cl         | 1    | PSSS  | PS | 1  | N  | Cl               | 16      | CiCINN  | CIN | 32   | NNOO   | NS  | 1  |
| C              | I   | 1    | PS   | 1      | CCCN   | Br               | 1    | CiNINN | CIN | 35      | NNNO   | O          | 1    |       |    |    | N  | CN               | 8       | CiCINN  | N   | 24   | NNOO   | Cl  | 1  |
| Cl             | O   | 1    | PI   | 1      | CCCO   | PSn              | 1    | CiNINN | CIO | 5       | NNNO   | NS         | 1    |       |    |    | N  | CIN              | 6       | CiCINN  | NO  | 20   | NNOS   | OS  | 17 |
| Cl             | Cl  | 1    | PBrC | 1      | CCCO   | CO               | 1    | CiNINN | NS  | 2       | NNNS   | NS         | 8    |       |    |    | N  | S                | 5       | CiCINN  | CIO | 17   | NNSeSe | N   | 1  |
| Cl             | N   | 1    | SN   | 9      | CCCP   | CP               | 1    | CiNINN | OS  | 1       | NNOO   | N          | 68   |       |    |    | N  | Br               | 5       | CiCINN  | O   | 5    | NNSS   | N   | 57 |
| N              | N   | 964  | SS   | 7      | CCCP   | IP               | 1    | CiNINN | Cl  | 1       | NNOO   | O          | 20   |       |    |    | N  | CIO              | 4       | CiCINN  | Cl  | 5    | NNSS   | NS  | 3  |
| N              | O   | 120  | SO   | 4      | CCCP   | PSn              | 1    | CiNINO | CIO | 2       | NNOO   | NO         | 20   |       |    |    | N  | CO               | 4       | CiCINN  | CIS | 3    | NNSS   | CN  | 1  |
| N              | NO  | 41   | SNP  | 3      | CCCS   | CS               | 6    | CiNNO  | CIN | 1       | NNOO   | Cl         | 7    |       |    |    | N  | P                | 4       | CiCINN  | NS  | 1    | NNSS   | NO  | 1  |
| N              | CIN | 31   | SCI  | 1      | CCCS   | Cl               | 1    | CiNNO  | N   | 1       | NNOO   | CIN        | 6    |       |    |    | N  | F                | 2       | CiCINN  | OS  | 1    | NOOO   | NO  | 54 |
| N              | CN  | 23   | SNO  | 1      | CCCSn  | CSn              | 1    | CiNNO  | OS  | 1       | NNOO   | S          | 3    |       |    |    | N  | FO               | 1       | CiCINO  | NO  | 10   | NOOO   | N   | 10 |
| N              | Cl  | 18   | SCN  | 1      | CCHH   | AsC              | 1    | CiNPP  | CN  | 2       | NNOS   | OS         | 1    |       |    |    | N  | NS               | 1       | CiCINO  | O   | 3    | NOOO   | CIN | 6  |
| N              | C   | 18   | SCS  | 1      | CCHH   | P                | 1    | CiNPP  | C   | 1       | NNPP   | N          | 19   |       |    |    | N  | FN               | 1       | CiCINO  | OS  | 3    | NOOO   | BrN | 1  |
| N              | P   | 12   | SP   | 1      | CCII   | Cl               | 1    | CiNPP  | CCI | 1       | NNPP   | NP         | 12   |       |    |    | N  | NP               | 1       | CiCINO  | CIN | 2    | NSSS   | N   | 1  |
| N              | S   | 7    | SI   | 1      | CCiSe  | Cl               | 1    | CiPPP  | CP  | 3       | NNPP   | P          | 5    |       |    |    | N  | OS               | 1       | CiCINO  | N   | 1    | OOS    | OS  | 1  |
| N              | BrN | 7    |      |        | CCITe  | Cl               | 4    | CiPPP  | CIP | 2       | NNPP   | S          | 4    |       |    |    | O  | O                | 135     | CiCIOO  | O   | 5    | OOSe   | OSe | 1  |
| N              | Br  | 7    |      |        | CCNN   | S                | 6    | CiPPP  | CCI | 1       | NNPP   | HN         | 2    |       |    |    | O  | N                | 46      | CiCIOO  | S   | 1    | OOPP   | N   | 1  |
| N              | CO  | 4    |      |        | CCNN   | CN               | 5    | CNNN   | CN  | 6       | NNPP   | CN         | 2    |       |    |    | O  | NO               | 18      | CiCISS  | CIS | 1    | OSeSe  | OSe | 1  |
| N              | CIO | 3    |      |        | CCNN   | N                | 3    | CNPN   | P   | 1       | NNPP   | CH         | 1    |       |    |    | O  | CIO              | 9       | CiNINN  | Cl  | 23   | OOS    | OS  | 4  |
| N              | NS  | 3    |      |        | CCNN   | CS               | 2    | CNNN   | S   | 1       | NNPP   | CIN        | 1    |       |    |    | O  | CIN              | 3       | CiNINN  | CIN | 18   | OOS    | N   | 2  |
| N              | IN  | 2    |      |        | CCNN   | BrC              | 1    | CNNO   | CO  | 1       | NNSeSe | N          | 3    |       |    |    | O  | BrO              | 1       | CiNINN  | CIO | 4    | OSSS   | O   | 1  |
| N              | CS  | 1    |      |        | CCNN   | NP               | 1    | CNPP   | CP  | 1       | NNSS   | N          | 7    |       |    |    | O  | Cl               | 1       | CiNINN  | NO  | 4    | PPSS   | S   | 1  |
| N              | As  | 1    |      |        | CCNN   | CO               | 1    | CNNS   | BrC | 3       | NNSS   | NS         | 2    |       |    |    | O  | Br               | 1       | CiNINN  | O   | 2    | PSSS   | PS  | 1  |
| N              | NP  | 1    |      |        | CCNN   | CCI              | 1    | CNNS   | CS  | 1       | NNSS   | S          | 2    |       |    |    | P  | Cl               | 5       | CiNNO   | CIN | 4    | N      |     |    |
| N              | OS  | 1    |      |        | CCNN   | Si               | 1    | CNOP   | CP  | 1       | NNSS   | O          | 1    |       |    |    | S  | S                | 29      | CiNNO   | OS  | 4    | N      |     |    |
| O              | N   | 64   |      |        | CCNO   | IP               | 1    | CNPP   | CP  | 2       | NNSS   | CN         | 1    |       |    |    | S  | N                | 3       | CiNNO   | NO  | 3    | N      |     |    |
| O              | O   | 48   |      |        | CCNS   | CS               | 1    | CNPP   | H   | 2       | NNSS   | BrP        | 1    |       |    |    |    |                  |         | CiNNO   | CIO | 2    | N      |     |    |
| O              | NO  | 7    |      |        | CCOO   | P                | 2    | CNPP   | HO  | 1       | NOOO   | NO         | 11   |       |    |    |    |                  |         | CiNNO   | CIS | 1    | N      |     |    |
| O              | S   | 2    |      |        | CCOP   | BrP              | 1    | CPPP   | CP  | 6       | NOOO   | N          | 3    |       |    |    |    |                  |         | CiNNO   | O   | 1    | N      |     |    |
| O              | Cl  | 2    |      |        | CCPP   | CN               | 4    | CPPP   | HN  | 4       | NPPP   | HP         | 4    |       |    |    |    |                  |         | CiNNO   | CIO | 2    | N      |     |    |
| O              | P   | 2    |      |        | CCPP   | NP               | 1    | CPPP   | C   | 2       | NPPP   | CCI        | 2    |       |    |    |    |                  |         | CiNNO   | Cl  | 1    | N      |     |    |
| O              | F   | 1    |      |        | CCPP   | BrN              | 1    | CPPP   | HP  | 2       | NPPP   | Cl         | 2    |       |    |    |    |                  |         | CiO     | CIO | 2    | N      |     |    |
| O              | Br  | 1    |      |        | CCPP   | Cl               | 1    | CPPP   | CN  | 1       | NPPP   | CIN        | 2    |       |    |    |    |                  |         | CN      | CN  | 3    | N      |     |    |
| P              | N   | 20   |      |        | CCPP   | CCI              | 1    | CPPP   | NP  | 1       | NPPP   | CP         | 1    |       |    |    |    |                  |         | CN      | NO  | 5    | N      |     |    |
| P              | Cl  | 15   |      |        | CCPS   | Cl               | 1    | CPPP   | CS  | 1       | NPPP   | HN         | 1    |       |    |    |    |                  |         | CN      | CO  | 1    | N      |     |    |
| P              | C   | 11   |      |        | CCSeTe | CSe              | 1    | CPPP   | CCI | 1       | NPPP   | NP         | 1    |       |    |    |    |                  |         | CPPP    | NP  | 1    | N      |     |    |
| P              | HN  | 10   |      |        | CCSeTe | CTe              | 1    | CPPS   | CS  | 4       | NPPSi  | CH         | 1    |       |    |    |    |                  |         | FFNN    | FN  | 1    | N      |     |    |
| P              | CH  | 6    |      |        | CCSiSi | C                | 1    | CPPSe  | CSe | 1       | NPPSi  | HN         | 1    |       |    |    |    |                  |         | NNNO    | NO  | 172  | N      |     |    |

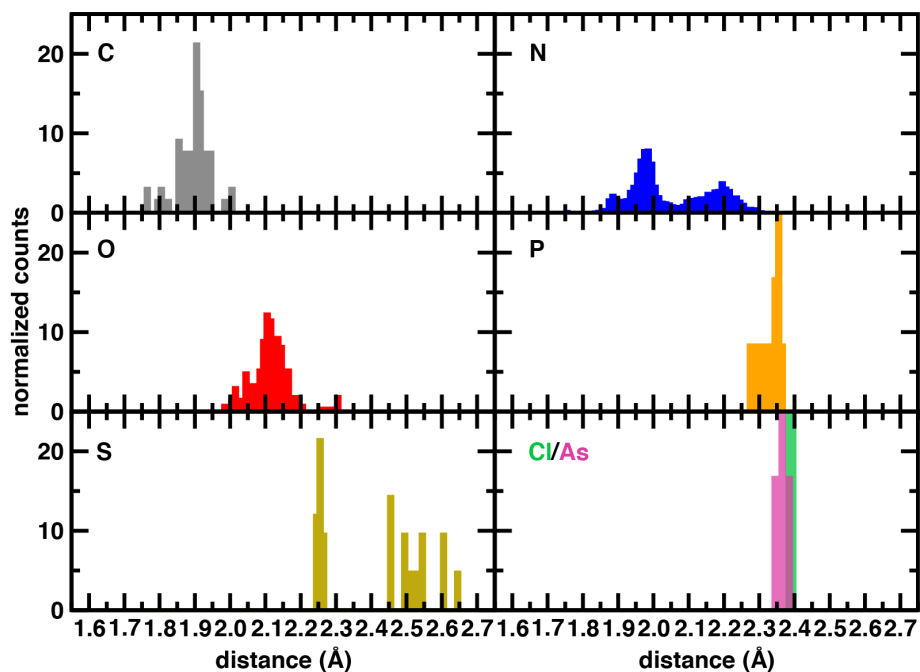

**Figure S6.** Normalized histograms of bond distances for 969 unique Fe(II) complexes with only a single element identity for the coordinating atom in the complex from the set of 1,447 complexes that have distortion outliers removed. All bond distances are shown in Å for the elements indicated in each inset.

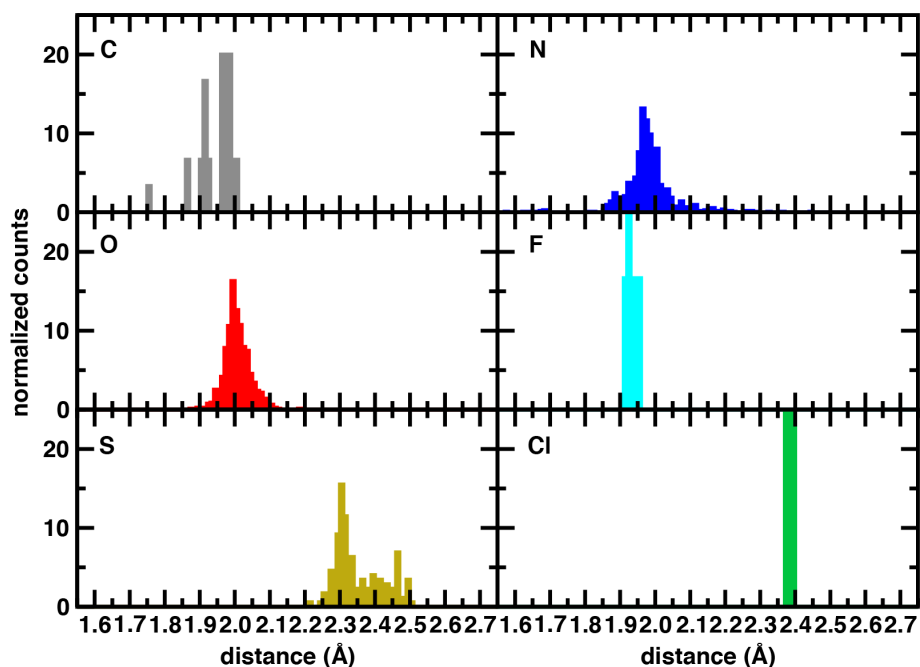

**Figure S7.** Normalized histograms of bond distances for 347 unique Fe(III) complexes with only a single element identity for the coordinating atom in the complex from the set of 590 complexes that have distortion outliers removed. All bond distances are shown in Å for the elements indicated in each inset.

**Table S7.** Covalent radii and sums of covalent radii used for definitions of relative distances of Fe–X bonds (in Å) as well as the low-spin and high-spin bounds expressed as both a distance and relative to the average covalent radii. The average Fe covalent radius of 1.42 Å is used and a low spin (LS) estimate of 1.32 Å and high spin (HS) estimate of 1.52 Å defines the low spin and high spin bounds. To draw HS and LS borders on relative bond distances, we select 0.95 and 1.05 based on typical fractions for different elements.

| Fe-X  | X radius (Å) | r <sub>Fe</sub> +r <sub>X</sub> |        |        | LS frac | HS frac |
|-------|--------------|---------------------------------|--------|--------|---------|---------|
|       |              | Avg. (Å)                        | LS (Å) | HS (Å) |         |         |
| Fe-As | 1.19         | 2.61                            | 2.51   | 2.71   | 0.96    | 1.04    |
| Fe-Br | 1.20         | 2.62                            | 2.52   | 2.72   | 0.96    | 1.04    |
| Fe-C  | 0.73         | 2.15                            | 2.05   | 2.25   | 0.95    | 1.05    |
| Fe-Cl | 1.02         | 2.44                            | 2.34   | 2.54   | 0.96    | 1.04    |
| Fe-F  | 0.57         | 1.99                            | 1.89   | 2.09   | 0.95    | 1.05    |
| Fe-H  | 0.31         | 1.73                            | 1.63   | 1.83   | 0.94    | 1.06    |
| Fe-I  | 1.39         | 2.81                            | 2.71   | 2.91   | 0.96    | 1.04    |
| Fe-N  | 0.71         | 2.13                            | 2.03   | 2.23   | 0.95    | 1.05    |
| Fe-O  | 0.66         | 2.08                            | 1.98   | 2.18   | 0.95    | 1.05    |
| Fe-P  | 1.07         | 2.49                            | 2.39   | 2.59   | 0.96    | 1.04    |
| Fe-S  | 1.05         | 2.47                            | 2.37   | 2.57   | 0.96    | 1.04    |
| Fe-Se | 1.20         | 2.62                            | 2.52   | 2.72   | 0.96    | 1.04    |
| Fe-Si | 1.11         | 2.53                            | 2.43   | 2.63   | 0.96    | 1.04    |
| Fe-Sn | 1.39         | 2.81                            | 2.71   | 2.91   | 0.96    | 1.04    |
| Fe-Te | 1.38         | 2.80                            | 2.70   | 2.90   | 0.96    | 1.04    |

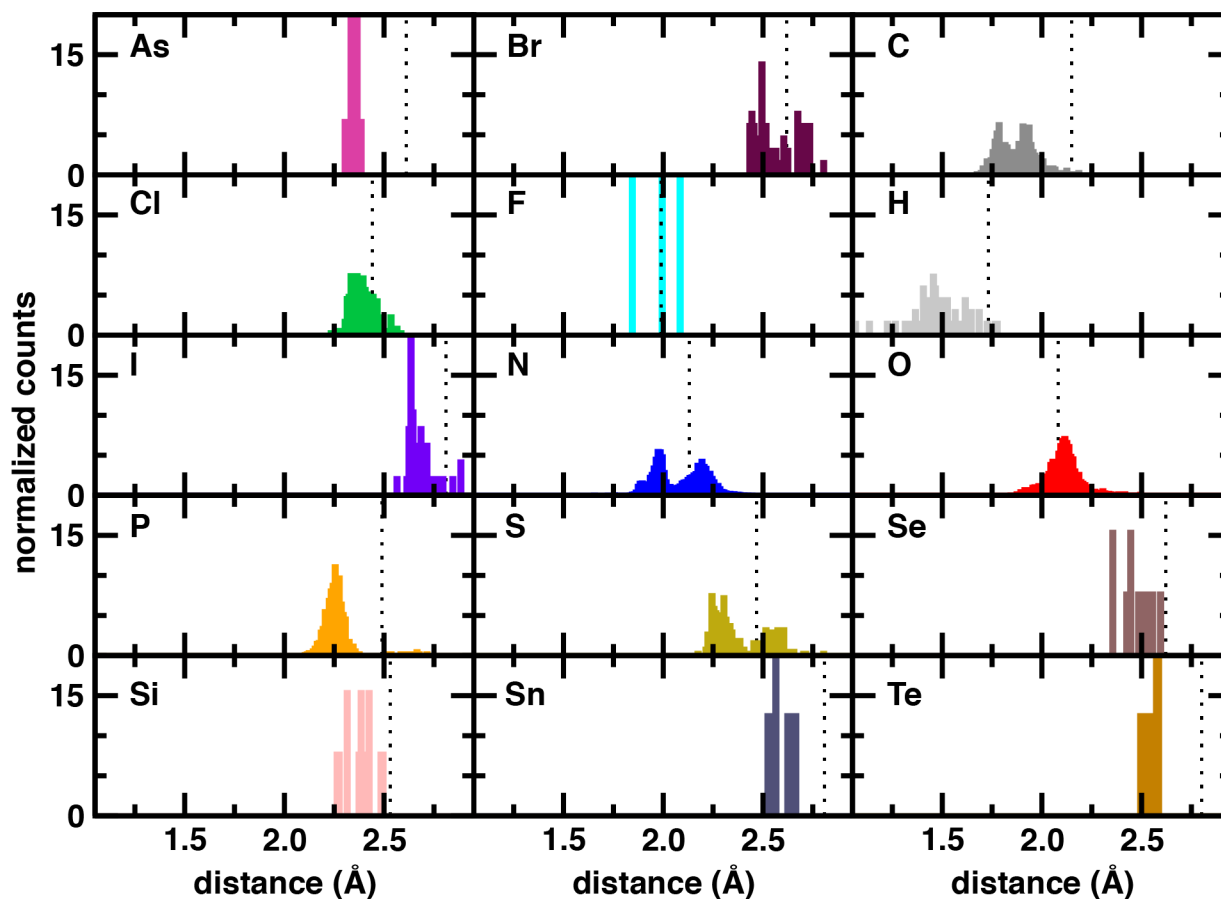

**Figure S8.** Normalized histograms of bond distances (in Å) for all unique Fe(II) complexes. The x-range of all graphs is fixed to 1.05 Å to 2.95 Å and the y-range between 0 and 20, causing truncation for some elements with narrow histograms. The averaged sum of covalent radii is indicated as a dotted line for each element. All bond distances are collected over all complexes in the data set, and data is shown for any element that occurs at least once as a coordinating atom in any complex in the data set.

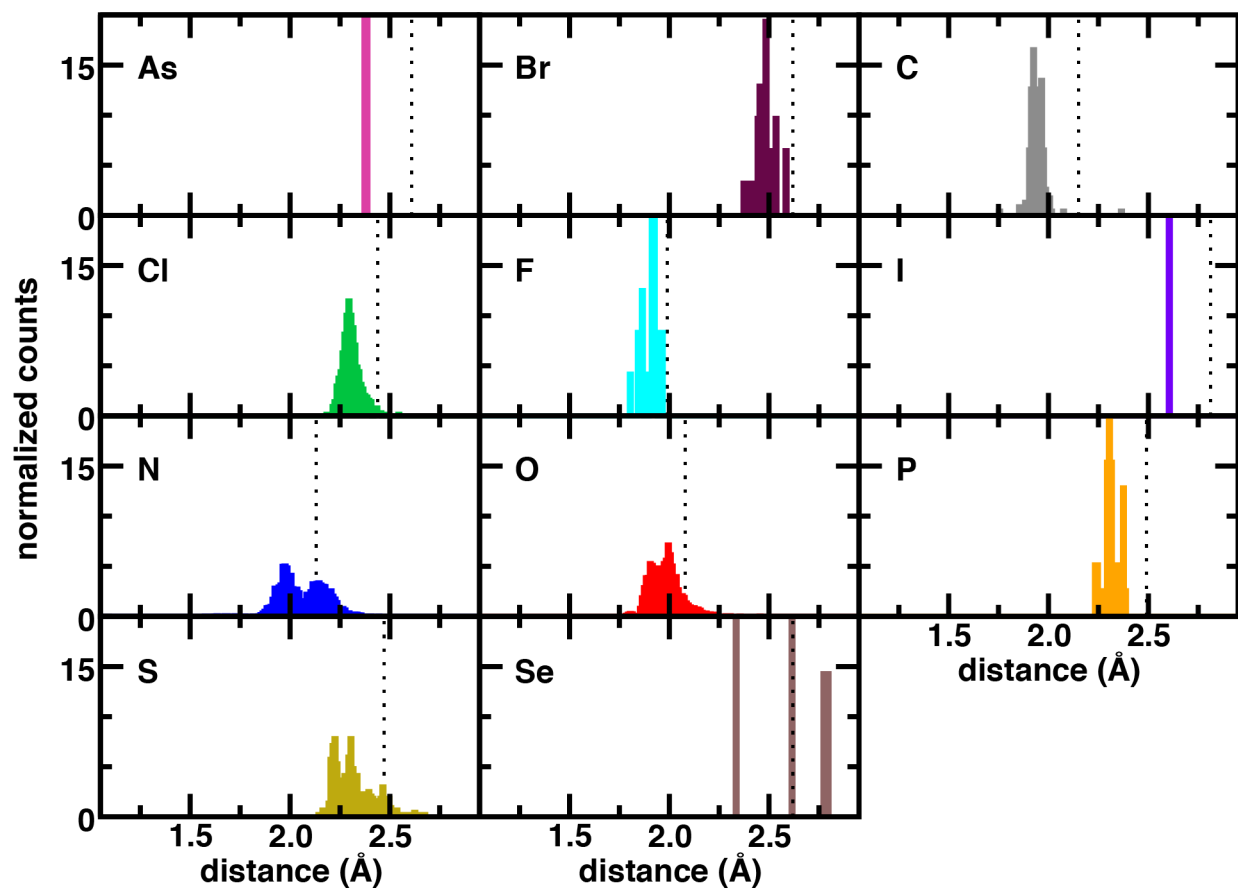

**Figure S9.** Normalized histograms of bond distances (in Å) for all unique Fe(III) complexes. The x-range of all graphs is fixed to 1.05 Å to 2.95 Å and the y-range between 0 and 20, causing truncation for some elements with narrow histograms. The averaged sum of covalent is indicated as a dotted line for each element. All bond distances are collected over all complexes in the data set, and data is shown for any element that occurs at least once as a coordinating atom in any complex in the data set.

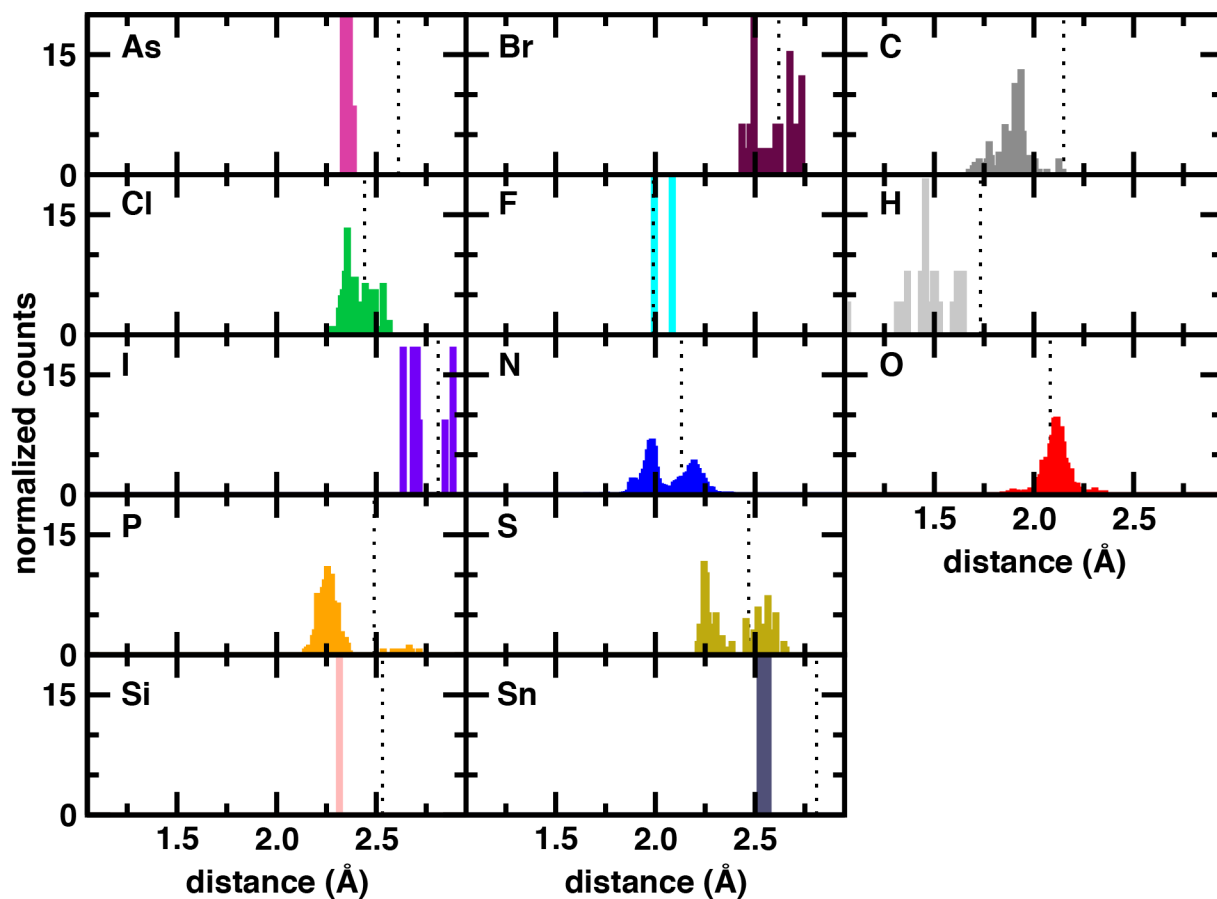

**Figure S10.** Normalized histograms of bond distances (in Å) for all ANN-compatible, low distortion, unique Fe(II) complexes. The x-range of all graphs is fixed to 1.05 Å to 2.95 Å and the y-range between 0 and 20, causing truncation for some elements with narrow histograms. The averaged sum of covalent radii is indicated as a dotted line for each element. All bond distances are collected over all complexes in the data set, and data is shown for any element that occurs at least once as a coordinating atom in any complex in the data set.

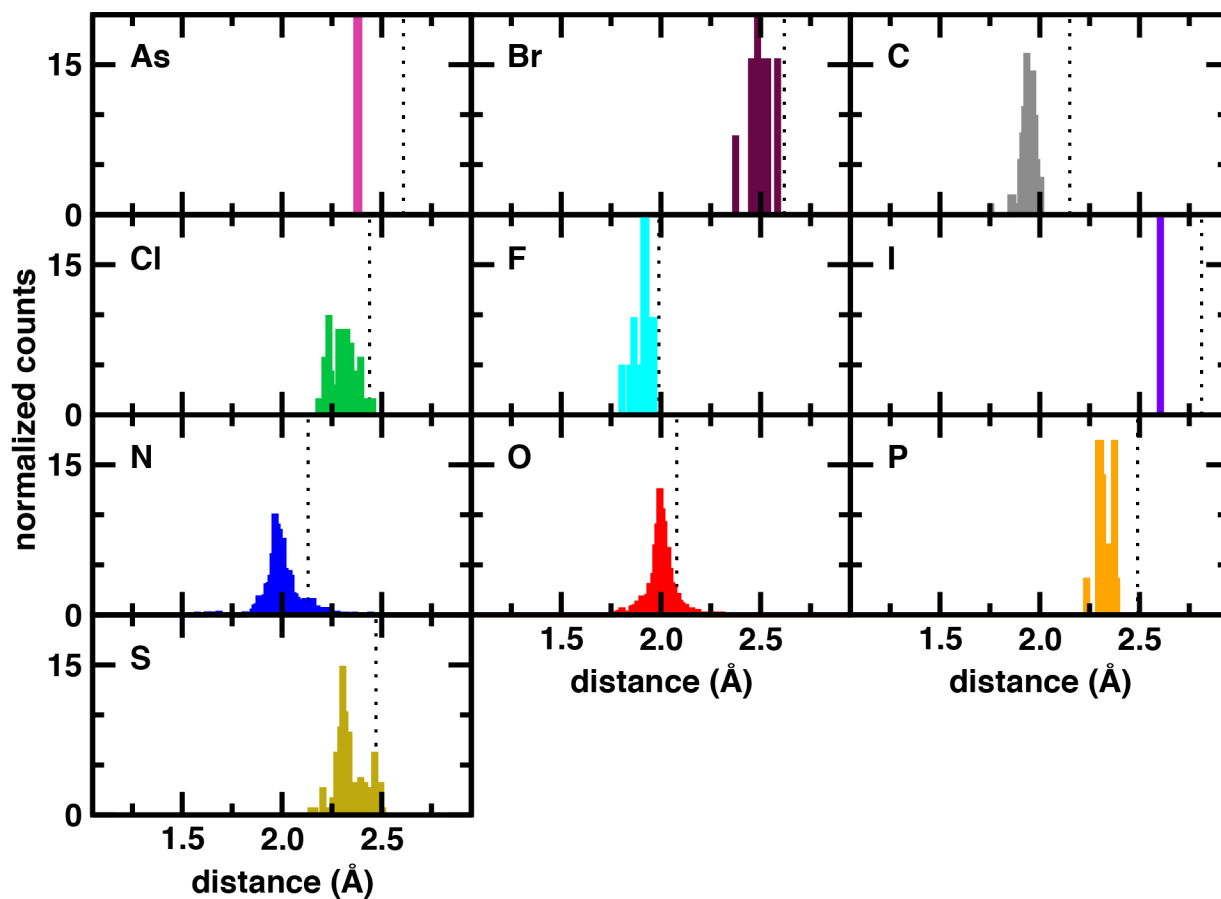

**Figure S11.** Normalized histograms of bond distances (in Å) for all ANN-compatible, low distortion, unique Fe(III) complexes. The x-range of all graphs is fixed to 1.05 Å to 2.95 Å and the y-range between 0 and 20, causing truncation for some elements with narrow histograms. The averaged sum of covalent radii is indicated as a dotted line for each element. All bond distances are collected over all complexes in the data set, and data is shown for any element that occurs at least once as a coordinating atom in any complex in the data set.



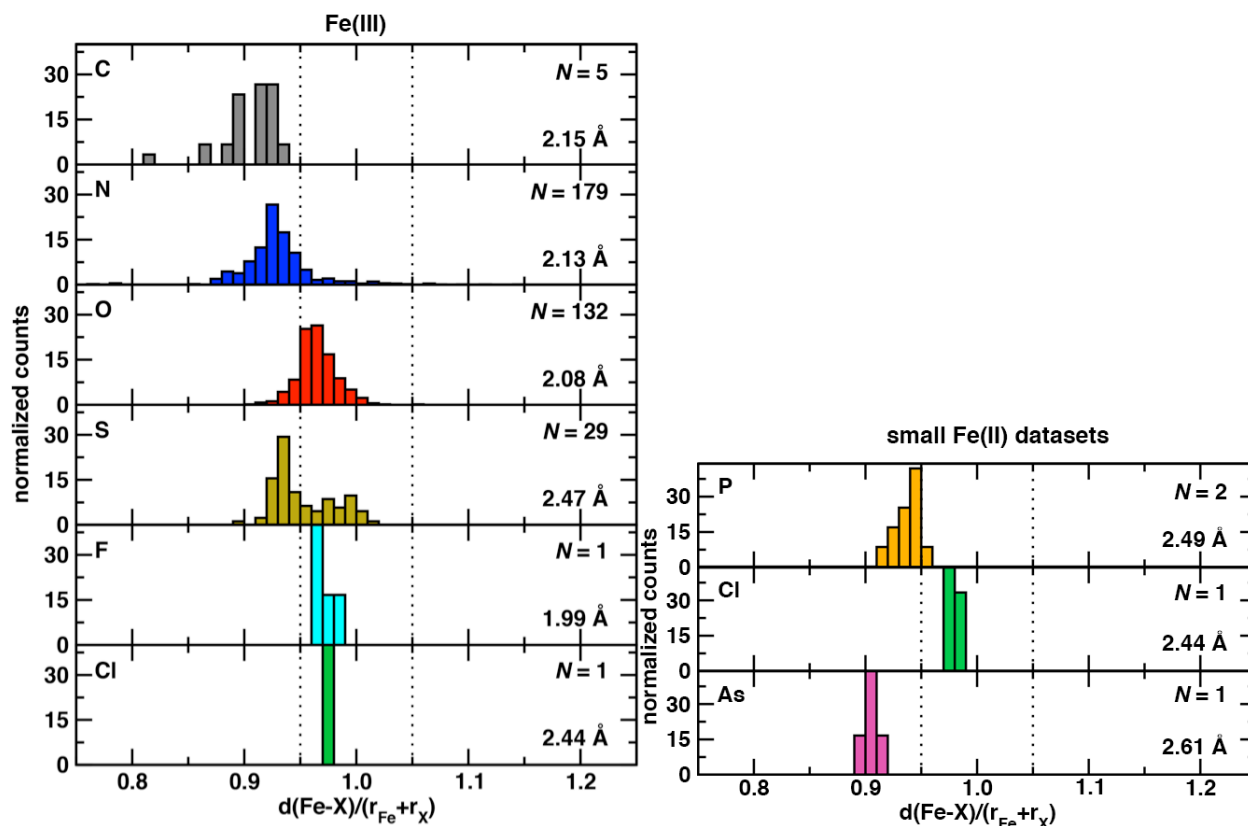

**Figure S12.** Normalized histograms of relative metal-ligand bond lengths for 347 mononuclear octahedral Fe(III) complexes (left) and P, Cl, or As Fe(II) complexes (right) in which all coordinating atoms are a single element, which is indicated in the upper left corner of each panel. The 347 Fe(III) complexes are obtained from the set of 590 complexes that have distortion outliers removed. Each relative metal-ligand bond length is obtained with respect to the sum of covalent radii of Fe and the ligand atom, and the value for each element is indicated in the bottom right corner of each panel. The total number of complexes used to compute each histogram is indicated in the top right corner of each panel, and each of the six bond lengths in the complex are used to construct the histogram. Vertical dotted lines indicate 0.95 and 1.05 relative metal-ligand bond length thresholds to nominally indicate low-spin or high-spin character, respectively. The 4 Fe(II) complexes are obtained from the Fe(II) dataset. Since there are only 1 or 2 complexes in these cases, it is difficult to reach conclusions about trends in bond lengths.

**Table S8.** Overall combination of equatorial and axial ligand element types and frequency of each occurrence observed after assignment of equatorial plane in 2,037 ANN-compatible, low-distortion, unique mononuclear iron octahedral complexes (1,447 Fe(II) and 590 Fe(III)). They are sorted by decreasing elemental symmetry – with homoelemental cases at top, followed by two ligand element types, followed by three ligand element types.

| Fe(II) |     |      |   |       |     | Fe(III) |     |      |     |       |   |
|--------|-----|------|---|-------|-----|---------|-----|------|-----|-------|---|
| eq.    | ax. | num. | # | typs. |     | eq.     | ax. | num. | #   | typs. |   |
| N      | N   | 902  | 1 | P     | Cl  | 1       | 2   | N    | N   | 179   | 1 |
| O      | O   | 45   | 1 | P     | I   | 1       | 2   | O    | O   | 132   | 1 |
| C      | C   | 11   | 1 | S     | P   | 1       | 2   | S    | S   | 29    | 1 |
| S      | S   | 7    | 1 | S     | I   | 1       | 2   | C    | C   | 5     | 1 |
| P      | P   | 2    | 1 | S     | CS  | 1       | 2   | Cl   | Cl  | 1     | 1 |
| As     | As  | 1    | 1 | S     | Cl  | 1       | 2   | F    | F   | 1     | 1 |
| Cl     | Cl  | 1    | 1 | P     | HN  | 10      | 3   | N    | O   | 70    | 2 |
| N      | O   | 111  | 2 | P     | CH  | 6       | 3   | N    | NO  | 29    | 2 |
| O      | N   | 57   | 2 | N     | CO  | 4       | 3   | O    | N   | 28    | 2 |
| N      | NO  | 36   | 2 | P     | CIH | 4       | 3   | N    | C   | 18    | 2 |
| N      | CIN | 29   | 2 | P     | HS  | 3       | 3   | N    | Cl  | 13    | 2 |
| N      | CN  | 23   | 2 | S     | NP  | 3       | 3   | O    | NO  | 10    | 2 |
| P      | N   | 20   | 2 | N     | CIO | 2       | 3   | N    | CN  | 8     | 2 |
| N      | Cl  | 18   | 2 | P     | CCl | 2       | 3   | C    | CN  | 7     | 2 |
| N      | C   | 16   | 2 | P     | CO  | 2       | 3   | N    | CIN | 6     | 2 |
| P      | Cl  | 15   | 2 | P     | CN  | 2       | 3   | O    | CIO | 6     | 2 |
| N      | P   | 12   | 2 | N     | OS  | 1       | 3   | N    | S   | 5     | 2 |
| P      | C   | 11   | 2 | N     | CS  | 1       | 3   | N    | Br  | 5     | 2 |
| N      | S   | 7    | 2 | P     | CF  | 1       | 3   | P    | Cl  | 5     | 2 |
| N      | Br  | 7    | 2 | P     | BrC | 1       | 3   | N    | P   | 4     | 2 |
| N      | BrN | 7    | 2 | P     | HO  | 1       | 3   | S    | N   | 3     | 2 |
| O      | NO  | 6    | 2 | P     | CIN | 1       | 3   | N    | F   | 2     | 2 |
| C      | CN  | 5    | 2 | S     | CN  | 1       | 3   | As   | I   | 1     | 2 |
| S      | N   | 5    | 2 |       |     |         |     | Cl   | O   | 1     | 2 |
| P      | Br  | 4    | 2 |       |     |         |     | Cl   | CIO | 1     | 2 |
| S      | O   | 4    | 2 |       |     |         |     | F    | O   | 1     | 2 |
| N      | NS  | 3    | 2 |       |     |         |     | F    | FO  | 1     | 2 |
| P      | CIP | 3    | 2 |       |     |         |     | N    | NP  | 1     | 2 |
| C      | Sn  | 2    | 2 |       |     |         |     | N    | FN  | 1     | 2 |
| C      | N   | 2    | 2 |       |     |         |     | N    | NS  | 1     | 2 |
| N      | IN  | 2    | 2 |       |     |         |     | O    | Cl  | 1     | 2 |
| O      | Cl  | 2    | 2 |       |     |         |     | O    | BrO | 1     | 2 |
| O      | S   | 2    | 2 |       |     |         |     | O    | Br  | 1     | 2 |
| P      | HP  | 2    | 2 |       |     |         |     | N    | CIO | 4     | 3 |
| As     | I   | 1    | 2 |       |     |         |     | N    | CO  | 4     | 3 |
| C      | Cl  | 1    | 2 |       |     |         |     | O    | CIN | 3     | 3 |
| C      | Si  | 1    | 2 |       |     |         |     | N    | OS  | 1     | 3 |
| C      | I   | 1    | 2 |       |     |         |     | N    | FO  | 1     | 3 |
| C      | CCl | 1    | 2 |       |     |         |     |      |     |       |   |
| C      | BrC | 1    | 2 |       |     |         |     |      |     |       |   |
| C      | CS  | 1    | 2 |       |     |         |     |      |     |       |   |
| Cl     | N   | 1    | 2 |       |     |         |     |      |     |       |   |
| Cl     | O   | 1    | 2 |       |     |         |     |      |     |       |   |
| N      | As  | 1    | 2 |       |     |         |     |      |     |       |   |
| N      | NP  | 1    | 2 |       |     |         |     |      |     |       |   |
| O      | Br  | 1    | 2 |       |     |         |     |      |     |       |   |
| O      | F   | 1    | 2 |       |     |         |     |      |     |       |   |
| O      | P   | 1    | 2 |       |     |         |     |      |     |       |   |
| P      | S   | 1    | 2 |       |     |         |     |      |     |       |   |
| P      | O   | 1    | 2 |       |     |         |     |      |     |       |   |

**Table S9.** Matrix of coordinating atom element pairs (or single element type on the diagonal) present in 1,979 of the ANN-compatible complex subset for Fe(II) (1,402 complexes, top) and Fe(III) (577 complexes, bottom). From the 2,037 ANN-compatible, low-distortion unique mononuclear iron octahedral complexes, there are 45 cases (25 involving nitrogen) with 3 element types for Fe(II) and 13 with 3 element types (all involving nitrogen) for Fe(III) which are combinations not used in bond pair analysis. N-containing pairs are bolded.

| Fe(II)  |           |            |            |          |           |           |          |          |          |          |           |           |          |  |
|---------|-----------|------------|------------|----------|-----------|-----------|----------|----------|----------|----------|-----------|-----------|----------|--|
|         | C         | N          | O          | Si       | P         | S         | As       | Sn       | H        | F        | Cl        | Br        | I        |  |
| C       | 11        | <b>46</b>  | 0          | 1        | 11        | 2         | 0        | 2        | 0        | 0        | 2         | 1         | 1        |  |
| N       | <b>46</b> | <b>902</b> | <b>210</b> | <b>0</b> | <b>33</b> | <b>15</b> | <b>1</b> | <b>0</b> | <b>0</b> | <b>0</b> | <b>48</b> | <b>14</b> | <b>2</b> |  |
| O       | 0         | <b>210</b> | 45         | 0        | 2         | 6         | 0        | 0        | 0        | 1        | 3         | 1         | 0        |  |
| Si      | 1         | <b>0</b>   | 0          | 0        | 0         | 0         | 0        | 0        | 0        | 0        | 0         | 0         | 0        |  |
| P       | 11        | <b>33</b>  | 2          | 0        | 2         | 2         | 0        | 0        | 2        | 0        | 19        | 4         | 1        |  |
| S       | 2         | <b>15</b>  | 6          | 0        | 2         | 7         | 0        | 0        | 0        | 0        | 1         | 0         | 1        |  |
| As      | 0         | <b>1</b>   | 0          | 0        | 0         | 0         | 1        | 0        | 0        | 0        | 0         | 0         | 1        |  |
| Sn      | 2         | <b>0</b>   | 0          | 0        | 0         | 0         | 0        | 0        | 0        | 0        | 0         | 0         | 0        |  |
| H       | 0         | <b>0</b>   | 0          | 0        | 2         | 0         | 0        | 0        | 0        | 0        | 0         | 0         | 0        |  |
| F       | 0         | <b>0</b>   | 1          | 0        | 0         | 0         | 0        | 0        | 0        | 0        | 0         | 0         | 0        |  |
| Cl      | 2         | <b>48</b>  | 3          | 0        | 19        | 1         | 0        | 0        | 0        | 0        | 1         | 0         | 0        |  |
| Br      | 1         | <b>14</b>  | 1          | 0        | 4         | 0         | 0        | 0        | 0        | 0        | 0         | 0         | 0        |  |
| I       | 1         | <b>2</b>   | 0          | 0        | 1         | 1         | 1        | 0        | 0        | 0        | 0         | 0         | 0        |  |
| Fe(III) |           |            |            |          |           |           |          |          |          |          |           |           |          |  |
|         | C         | N          | O          | Si       | P         | S         | As       | Sn       | H        | F        | Cl        | Br        | I        |  |
| C       | 5         | <b>33</b>  | 0          | 0        | 0         | 0         | 0        |          | 0        | 0        | 0         | 0         | 0        |  |
| N       | <b>33</b> | <b>179</b> | <b>137</b> | <b>0</b> | <b>5</b>  | <b>9</b>  | <b>0</b> | <b>0</b> | <b>0</b> | <b>3</b> | <b>19</b> | <b>5</b>  | <b>0</b> |  |
| O       | 0         | <b>137</b> | 132        | 0        | 0         | 0         | 0        | 0        | 0        | 2        | 9         | 2         | 0        |  |
| Si      | 0         | <b>0</b>   | 0          | 0        | 0         | 0         | 0        | 0        | 0        | 0        | 0         | 0         | 0        |  |
| P       | 0         | <b>5</b>   | 0          | 0        | 0         | 0         | 0        | 0        | 0        | 0        | 5         | 0         | 0        |  |
| S       | 0         | <b>9</b>   | 0          | 0        | 0         | 29        | 0        | 0        | 0        | 0        | 0         | 0         | 0        |  |
| As      | 0         | <b>0</b>   | 0          | 0        | 0         | 0         | 0        | 0        | 0        | 0        | 0         | 0         | 1        |  |
| Sn      | 0         | <b>0</b>   | 0          | 0        | 0         | 0         | 0        | 0        | 0        | 0        | 0         | 0         | 1        |  |
| H       | 0         | <b>0</b>   | 0          | 0        | 0         | 0         | 0        | 0        | 0        | 0        | 0         | 0         | 0        |  |
| F       | 0         | <b>3</b>   | 2          | 0        | 0         | 0         | 0        | 0        | 0        | 1        | 0         | 0         | 0        |  |
| Cl      | 0         | <b>19</b>  | 9          | 0        | 5         | 0         | 0        | 0        | 0        | 0        | 1         | 0         | 0        |  |
| Br      | 0         | <b>5</b>   | 2          | 0        | 0         | 0         | 0        | 0        | 0        | 0        | 0         | 0         | 0        |  |
| I       | 0         | <b>0</b>   | 0          | 0        | 0         | 0         | 1        | 0        | 0        | 0        | 0         | 0         | 0        |  |

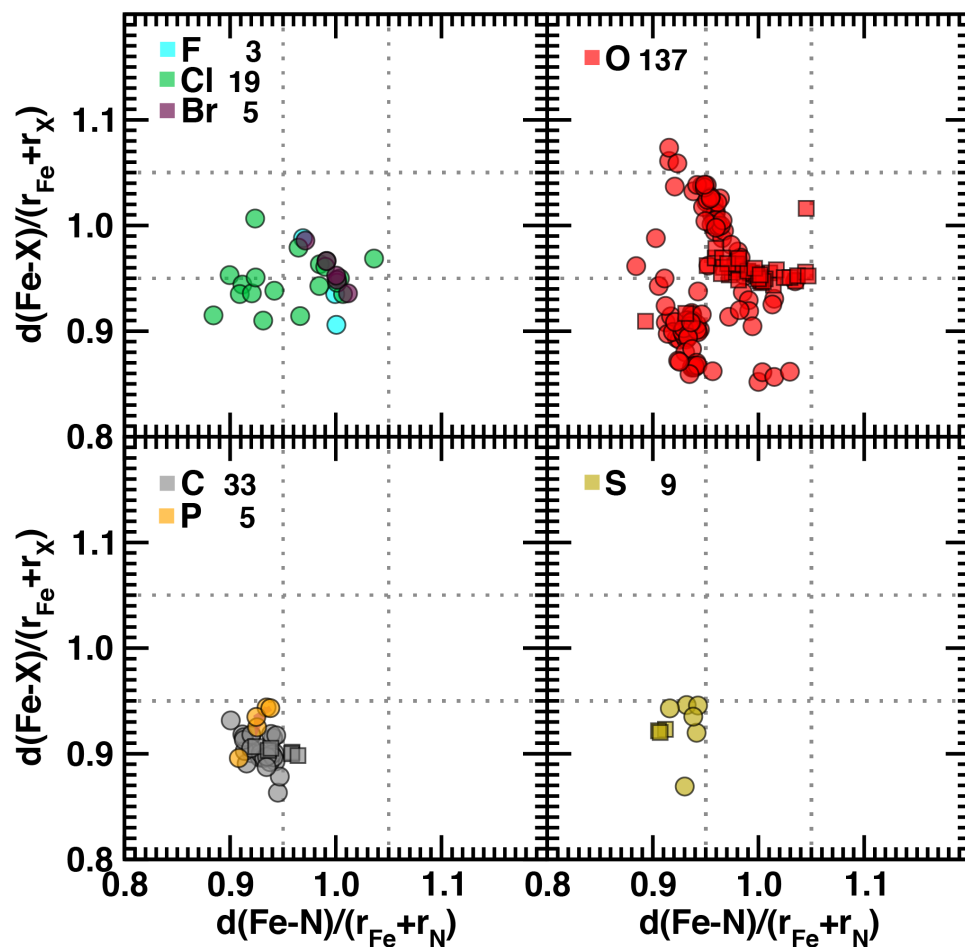

**Figure S13.** Fe–N vs. Fe–X (X indicated according to inset legend) bond length ratios computed relative to sums of covalent radii for mononuclear octahedral Fe(III) complexes: F, Cl, or Br halides (top left), O (top right), C or P (bottom left), and S (bottom right). Ratios of 0.95 and 1.05 are indicated by grey dashed lines. Circle symbols indicate cases where N is the majority coordinating element (i.e., equatorial plane and up to one of the axial positions), whereas square symbols reflect the reverse case. The Fe–N, Fe–X pair is computed from the average of all bonds of that type in the complex. Each element is colored with translucent fill to show high density regions according to each panel’s inset legend, and the total number of cases is indicated in the legend.

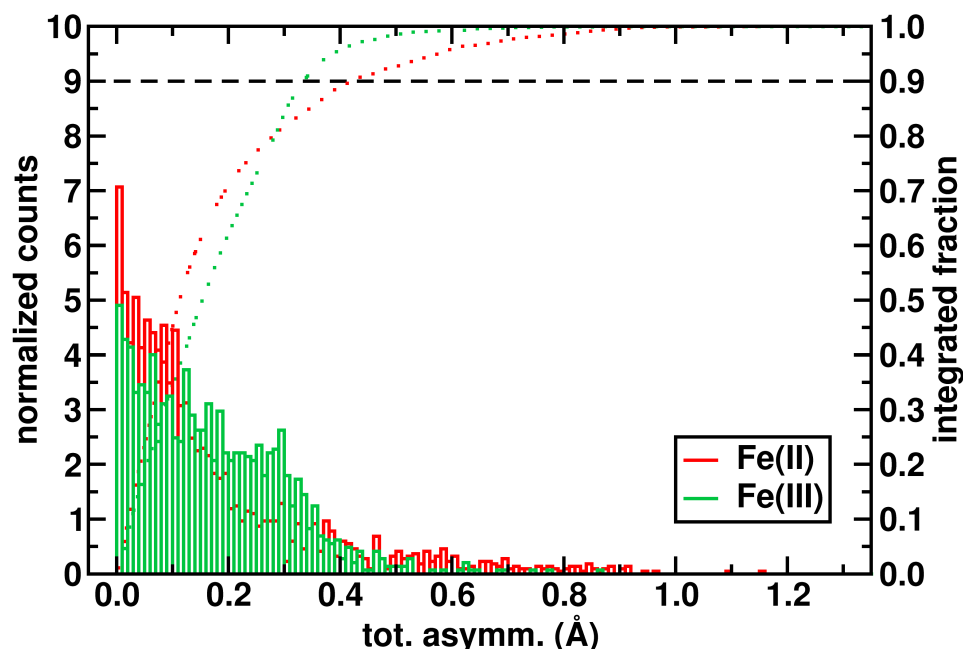

**Figure S14.** Degree of distortion (i.e., max-min distances) overall for all unique Fe(II) (shown in red) or Fe(III) (shown in green) complexes. A normalized histogram with 0.01 Å bins is shown with axis at left as well as an integrated fraction shown as a dotted line with the same coloring, axis shown at right. A black dashed horizontal line indicates where the fraction reaches 0.9.

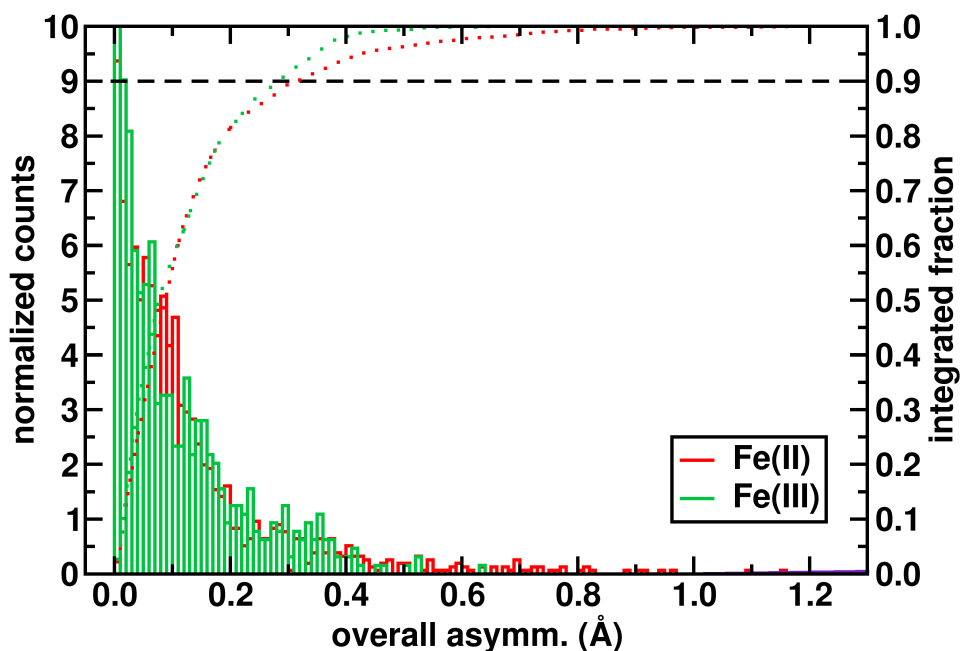

**Figure S15.** Degree of distortion (i.e., max-min distances) overall for ANN-compatible (i.e., same elements in the equatorial plane), unique Fe(II) (shown in red) or Fe(III) (shown in green) complexes. A normalized histogram with 0.01 Å bins is shown with axis at left as well as an integrated fraction shown as a dotted line with the same coloring, axis shown at right. A black dashed horizontal line indicates where the fraction reaches 0.9.

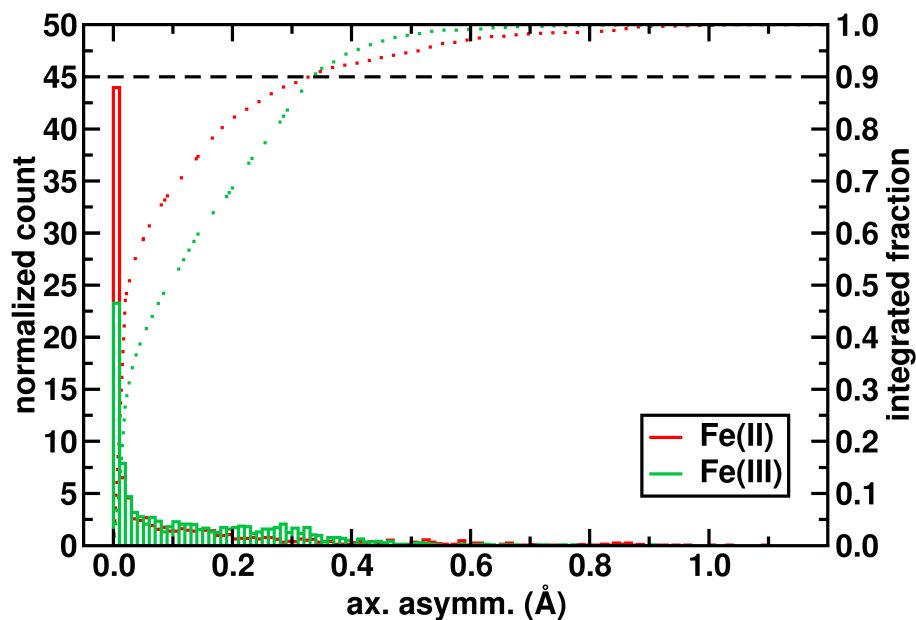

**Figure S16.** Degree of distortion (i.e., max-min distances) between axial metal–ligand distances based on equatorial plane selected to minimize the overall equatorial distortion for all 3,627 unique Fe(II) (shown in red) or Fe(III) (shown in green) complexes. A normalized histogram with 0.01 Å bins is shown with axis at left as well as an integrated fraction shown as a dotted line with the same coloring, axis shown at right. A black dashed horizontal line indicates where the fraction reaches 0.9.

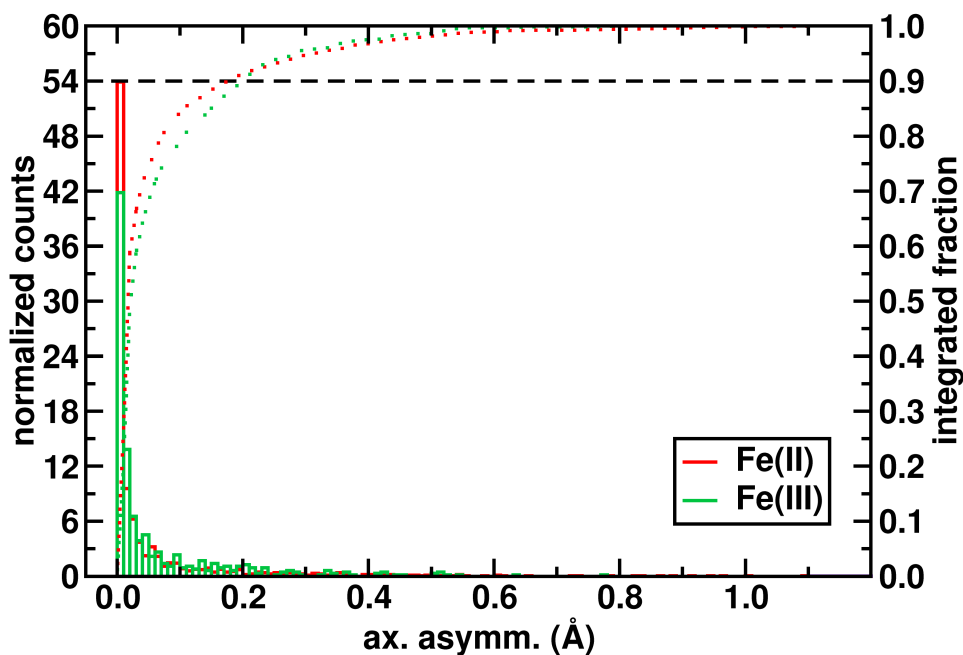

**Figure S17.** Degree of distortion (i.e., max-min distances) between axial metal–ligand distances for ANN-compatible (i.e., same elements in the equatorial plane), unique Fe(II) (shown in red) or Fe(III) (shown in green) complexes. A normalized histogram with 0.01 Å bins is shown with axis at left as well as an integrated fraction shown as a dotted line with the same coloring, axis shown at right. A black dashed horizontal line indicates where the fraction reaches 0.9.

**Table S10.** Results of spin state classification of the entire AC set: cases of each spin state classification type for HS and LS states along with total number are indicated.

| Detailed category            | Fe(II)      | Fe(III)    | Composite category | Fe(II)      | Fe(III)    |
|------------------------------|-------------|------------|--------------------|-------------|------------|
| LS below, good Uncertainty   | 207         | 101        | LS definite        | 288         | 180        |
| LS between, good uncertainty | 81          | 79         |                    |             |            |
| LS below, bad uncertainty    | 490         | 178        | LS lean            | 490         | 178        |
| LS between, bad uncertainty  | 49          | 70         |                    |             |            |
| Ambiguous                    | 22          | 11         | ambiguous          | 150         | 129        |
| HS between, bad uncertainty  | 79          | 48         |                    |             |            |
| HS above, bad uncertainty    | 200         | 28         | HS lean            | 200         | 28         |
| HS between, good uncertainty | 180         | 67         |                    |             |            |
| HS above, good uncertainty   | 139         | 8          | HS definite        | 319         | 75         |
| <b>Total</b>                 | <b>1447</b> | <b>590</b> |                    | <b>1447</b> | <b>590</b> |

**Table S11.** Number of overall HS or LS complexes classified in the HE set grouped by oxidation state (Fe(II) or Fe(III)) and ligand coordinating element, where relevant (P and As are shown only for Fe(II), whereas F is shown only for Fe(III)), as well as the subset for which the uncertainty score is less than or equal to 0.5 ('high confidence').

| Fe(II) overall          |     |    |     |    |    |   |    |
|-------------------------|-----|----|-----|----|----|---|----|
|                         | N   | C  | O   | S  | Cl | P | As |
| LS                      | 327 | 11 | 15  | 4  | 1  | 1 | 1  |
| HS                      | 563 | 0  | 30  | 3  | 0  | 1 | 0  |
| Unk.                    | 12  | 0  | 0   | 0  | 0  | 0 | 0  |
| Total                   | 902 | 11 | 45  | 7  | 1  | 2 | 1  |
| Fe(II) high confidence  |     |    |     |    |    |   |    |
|                         | N   | C  | O   | S  | Cl | P | As |
| LS                      | 194 | 11 | 10  | 2  | 0  | 1 | 1  |
| HS                      | 199 | 0  | 21  | 1  | 0  | 1 | 0  |
| Total                   | 393 | 11 | 31  | 3  | 0  | 2 | 1  |
| Fe(III) overall         |     |    |     |    |    |   |    |
|                         | N   | C  | O   | S  | Cl | F |    |
| LS                      | 160 | 5  | 77  | 17 | 1  | 1 |    |
| HS                      | 19  | 0  | 51  | 12 | 0  | 0 |    |
| Unk.                    | 0   | 0  | 4   | 0  | 0  | 0 |    |
| Total                   | 179 | 5  | 132 | 29 | 1  | 1 |    |
| Fe(III) high confidence |     |    |     |    |    |   |    |
|                         | N   | C  | O   | S  | Cl | F |    |
| LS                      | 67  | 3  | 42  | 10 | 0  | 0 |    |
| HS                      | 7   | 0  | 37  | 1  | 0  | 0 |    |
| Total                   | 74  | 3  | 79  | 11 | 0  | 0 |    |

**Table S12.** Number of confident spin state assignments (uncertainty score less than or equal to 0.5) in the NX set for X=Cl, O, S in Fe(II) or Fe(III) complexes as well as the total number of each type and the percentage of the total number assigned.

|             | Fe(II)                    |    |    |       |          | Fe(III)                   |    |    |       |          |
|-------------|---------------------------|----|----|-------|----------|---------------------------|----|----|-------|----------|
|             | Assigned, high confidence |    |    |       |          | Assigned, high confidence |    |    |       |          |
|             | All                       | LS | HS | LS+HS | % Assign | All                       | LS | HS | LS+HS | % Assign |
| <b>N/Cl</b> | 48                        | 4  | 6  | 10    | 21%      | 19                        | 3  | 2  | 5     | 26%      |
| <b>N/O</b>  | 210                       | 11 | 78 | 89    | 42%      | 137                       | 22 | 24 | 46    | 34%      |
| <b>N/S</b>  | 15                        | 7  | 1  | 8     | 53%      | 9                         | 5  | 0  | 5     | 56%      |



**Table S13.** Summary of properties of 46 Fe(II) SCO complexes: LS and HS ANN equatorial bond length predictions (in Å) compared to the equatorially averaged low T and high T XRD structures. Classification based on the closest corresponding ANN prediction to the structure is shown in the class column, and the differences used for this calculation are also shown. Key minimum, maximum, and average values are also reported.

|    | refcode | max dent   | LS ANN eq     | HS ANN eq     | low T eq av   | high T eq av  | low T class | high T class | LS ANN-low T  | HS ANN-low T | HS ANN-high T | LS ANN-high T |
|----|---------|------------|---------------|---------------|---------------|---------------|-------------|--------------|---------------|--------------|---------------|---------------|
| 1  | PEJQIF  | 1          | 1.9547        | 2.3356        | 2.0010        | 2.1811        | LS          | HS           | 0.0463        | 0.3346       | 0.1544        | 0.2264        |
| 2  | YAGYIP  | 1          | 2.0300        | 2.3162        | 2.0887        | 2.2208        | LS          | HS           | 0.0587        | 0.2275       | 0.0954        | 0.1908        |
| 3  | BEXXOT  | 2          | 2.0031        | 2.2696        | 1.9947        | 2.1607        | LS          | HS           | 0.0084        | 0.2750       | 0.1089        | 0.1576        |
| 4  | DOQRAC  | 3          | 2.0184        | 2.2779        | 2.0190        | 2.1343        | LS          | LS           | 0.0006        | 0.2589       | 0.1436        | 0.1158        |
| 5  | BAKGUR  | 2          | 2.0032        | 2.2271        | 2.0082        | 2.2052        | LS          | HS           | 0.0050        | 0.2189       | 0.0219        | 0.2020        |
| 6  | ECODOS  | 2          | 2.0074        | 2.2271        | 1.9873        | 2.1839        | LS          | HS           | 0.0201        | 0.2398       | 0.0432        | 0.1765        |
| 7  | OLAYAC  | 2          | 2.0441        | 2.2629        | 2.0023        | 2.1658        | LS          | HS           | 0.0418        | 0.2606       | 0.0971        | 0.1217        |
| 8  | AKENAF  | 2          | 1.9680        | 2.1841        | 1.9491        | 2.0929        | LS          | HS           | 0.0190        | 0.2350       | 0.0913        | 0.1248        |
| 9  | ECODIM  | 2          | 1.9954        | 2.1958        | 2.0335        | 2.1835        | LS          | HS           | 0.0381        | 0.1624       | 0.0123        | 0.1881        |
| 10 | ZERDOS  | 2          | 1.9857        | 2.1854        | 1.9962        | 2.1469        | LS          | HS           | 0.0106        | 0.1891       | 0.0384        | 0.1613        |
| 11 | WUCLAJ  | 2          | 1.9666        | 2.1663        | 1.9946        | 2.1923        | LS          | HS           | 0.0280        | 0.1717       | 0.0260        | 0.2256        |
| 12 | IDUHAT  | 2          | 1.9495        | 2.1488        | 1.9790        | 2.1753        | LS          | HS           | 0.0295        | 0.1698       | 0.0266        | 0.2259        |
| 13 | SEYDAD  | 2          | 1.9941        | 2.1892        | 1.9832        | 2.2006        | LS          | HS           | 0.0109        | 0.2061       | 0.0114        | 0.2065        |
| 14 | FIWZOZ  | 3          | 1.9575        | 2.1461        | 2.0056        | 2.1747        | LS          | HS           | 0.0481        | 0.1405       | 0.0286        | 0.2172        |
| 15 | MALJIT  | 3          | 2.0005        | 2.1856        | 1.9833        | 2.1595        | LS          | HS           | 0.0172        | 0.2023       | 0.0261        | 0.1590        |
| 16 | BAYZEH  | 2          | 1.9147        | 2.0992        | 1.9781        | 2.1443        | LS          | HS           | 0.0634        | 0.1211       | 0.0450        | 0.2296        |
| 17 | MUCRUZ  | 3          | 1.9426        | 2.1236        | 1.9349        | 2.1279        | LS          | HS           | 0.0077        | 0.1887       | 0.0043        | 0.1853        |
| 18 | OTUJUU  | 2          | 1.9680        | 2.1471        | 1.9946        | 2.1959        | LS          | HS           | 0.0266        | 0.1525       | 0.0488        | 0.2279        |
| 19 | QUNYEE  | 2          | 1.9367        | 2.1116        | 1.9588        | 2.1581        | LS          | HS           | 0.0221        | 0.1528       | 0.0465        | 0.2215        |
| 20 | IMAHIO  | 2          | 2.0459        | 2.2182        | 1.9817        | 2.1198        | LS          | LS           | 0.0642        | 0.2365       | 0.0984        | 0.0739        |
| 21 | MAVVUD  | 3          | 1.9727        | 2.1419        | 1.9547        | 2.1616        | LS          | HS           | 0.0180        | 0.1872       | 0.0197        | 0.1889        |
| 22 | RESWIW  | 3          | 1.9736        | 2.1389        | 1.9933        | 2.1631        | LS          | HS           | 0.0197        | 0.1456       | 0.0242        | 0.1895        |
| 23 | IGERIX  | 3          | 1.9200        | 2.0773        | 1.9672        | 2.1781        | LS          | HS           | 0.0473        | 0.1101       | 0.1008        | 0.2581        |
| 24 | CEVXOT  | 2          | 2.0029        | 2.1589        | 1.9880        | 2.1610        | LS          | HS           | 0.0149        | 0.1709       | 0.0021        | 0.1581        |
| 25 | FEYWIR  | 2          | 2.0270        | 2.1818        | 1.9857        | 2.1958        | LS          | HS           | 0.0413        | 0.1961       | 0.0140        | 0.1688        |
| 26 | EKAKIM  | 3          | 1.9261        | 2.0662        | 1.9388        | 2.1538        | LS          | HS           | 0.0128        | 0.1274       | 0.0876        | 0.2277        |
| 27 | UFIPIJ  | 2          | 1.9282        | 2.0632        | 1.9601        | 2.1619        | LS          | HS           | 0.0319        | 0.1031       | 0.0987        | 0.2337        |
| 28 | MUCREJ  | 3          | 1.9269        | 2.0584        | 1.9316        | 2.1350        | LS          | HS           | 0.0047        | 0.1267       | 0.0766        | 0.2081        |
| 29 | SEYDUX  | 2          | 2.0034        | 2.1336        | 1.9863        | 2.2092        | LS          | HS           | 0.0171        | 0.1473       | 0.0757        | 0.2058        |
| 30 | RIPZAS  | 3          | 1.9643        | 2.0942        | 2.0487        | 2.1451        | HS          | HS           | 0.0844        | 0.0455       | 0.0509        | 0.1808        |
| 31 | QALYOU  | 2          | 1.9650        | 2.0948        | 1.9741        | 2.1422        | LS          | HS           | 0.0091        | 0.1207       | 0.0474        | 0.1772        |
| 32 | NETGEA  | 2          | 2.0810        | 2.2064        | 1.9901        | 2.2124        | LS          | HS           | 0.0909        | 0.2164       | 0.0059        | 0.1314        |
| 33 | AFANEB  | 3          | 1.9610        | 2.0778        | 1.9519        | 2.1529        | LS          | HS           | 0.0090        | 0.1259       | 0.0751        | 0.1920        |
| 34 | PEJPOK  | 2          | 1.9975        | 2.1131        | 1.9969        | 2.2109        | LS          | HS           | 0.0006        | 0.1162       | 0.0978        | 0.2134        |
| 35 | ABISOV  | 4          | 1.9827        | 2.0969        | 1.9616        | 2.1153        | LS          | HS           | 0.0211        | 0.1353       | 0.0184        | 0.1327        |
| 36 | EXOMOU  | 3          | 1.9712        | 2.0696        | 1.9673        | 2.1504        | LS          | HS           | 0.0039        | 0.1023       | 0.0808        | 0.1792        |
| 37 | GEFCAY  | 3          | 1.9622        | 2.0601        | 1.9642        | 2.1596        | LS          | HS           | 0.0019        | 0.0959       | 0.0995        | 0.1973        |
| 38 | IXAQEF  | 5          | 1.9722        | 2.0614        | 2.0141        | 2.1215        | LS          | HS           | 0.0419        | 0.0473       | 0.0601        | 0.1494        |
| 39 | QERDIB  | 3          | 1.9723        | 2.0580        | 1.9957        | 2.1767        | LS          | HS           | 0.0233        | 0.0623       | 0.1187        | 0.2044        |
| 40 | JEJROI  | 4          | 1.9925        | 2.0681        | 1.9901        | 2.1504        | LS          | HS           | 0.0023        | 0.0779       | 0.0823        | 0.1579        |
| 41 | JEJREY  | 4          | 1.9982        | 2.0403        | 1.9964        | 2.1563        | LS          | HS           | 0.0018        | 0.0439       | 0.1160        | 0.1581        |
| 42 | PASDOD  | 6          | 1.9798        | 2.0184        | 1.9767        | 2.1943        | LS          | HS           | 0.0031        | 0.0416       | 0.1760        | 0.2145        |
| 43 | TIHTAF  | 4          | 2.0506        | 2.0839        | 2.0097        | 2.1865        | LS          | HS           | 0.0408        | 0.0742       | 0.1026        | 0.1359        |
| 44 | DIHCUV  | 4          | 2.0486        | 2.0657        | 2.0290        | 2.1964        | LS          | HS           | 0.0195        | 0.0367       | 0.1308        | 0.1479        |
| 45 | VASYUL  | 4          | 1.9968        | 2.0137        | 1.9924        | 2.1381        | LS          | HS           | 0.0045        | 0.0214       | 0.1244        | 0.1413        |
| 46 | IMANIT  | 6          | 1.9833        | 1.9914        | 2.0810        | 2.1773        | HS          | HS           | 0.0977        | 0.0896       | 0.1860        | 0.1941        |
|    |         | <b>Avg</b> | <b>1.9836</b> | <b>2.1359</b> | <b>1.9896</b> | <b>2.1659</b> |             |              | <b>0.0267</b> |              | <b>0.0704</b> |               |
|    |         | <b>Min</b> | <b>1.9147</b> | <b>1.9914</b> | <b>1.9316</b> | <b>2.0929</b> |             |              | <b>0.0006</b> |              | <b>0.0021</b> |               |
|    |         | <b>Max</b> | <b>2.0810</b> | <b>2.3356</b> | <b>2.0887</b> | <b>2.2208</b> |             |              | <b>0.0977</b> |              | <b>0.1860</b> |               |

## References

- 1 Janet, J. P. & Kulik, H. J. Predicting Electronic Structure Properties of Transition Metal Complexes with Neural Networks. *Chem. Sci.* **8**, 5137-5152 (2017).
- 2 Janet, J. P. & Kulik, H. J. Resolving transition metal chemical space: feature selection for machine learning and structure-property relationships. *Journal of Physical Chemistry A* **121**, 8939-8954 (2017).
